# Supplementary material for: Entorhinal cholecystokinin in Alzheimer’s disease: its earliest vulnerability and rescue effects across different disease stages
Source: Research Square preprint supplement (doi:10.21203/rs.3.rs-7630814/v1), 2025-10-29
Supplement: Supplementary file 1 [file 3d222a9ec18f3270bff2b6e3.docx]

Supplementary Information

**Entorhinal cholecystokinin in Alzheimer’s disease: its earliest vulnerability and rescue effects across different disease stages**

Yixuan Sui1**†**, Nan Zhang1**†***, Xi Chen1,2, Micky D Tortorella3, and Jufang He1

**Affiliations**

1Department of Neuroscience, 2Department of Biomedical Science, City University of Hong Kong, Kowloon, Hong Kong, China

3Centre for Regenerative Medicine and Health, Hong Kong Institute of Science & Innovation, Chinese Academy of Sciences, Hong Kong, China

*Correspondence: nzhang55@cityu.edu.hk

† Equal contributions.


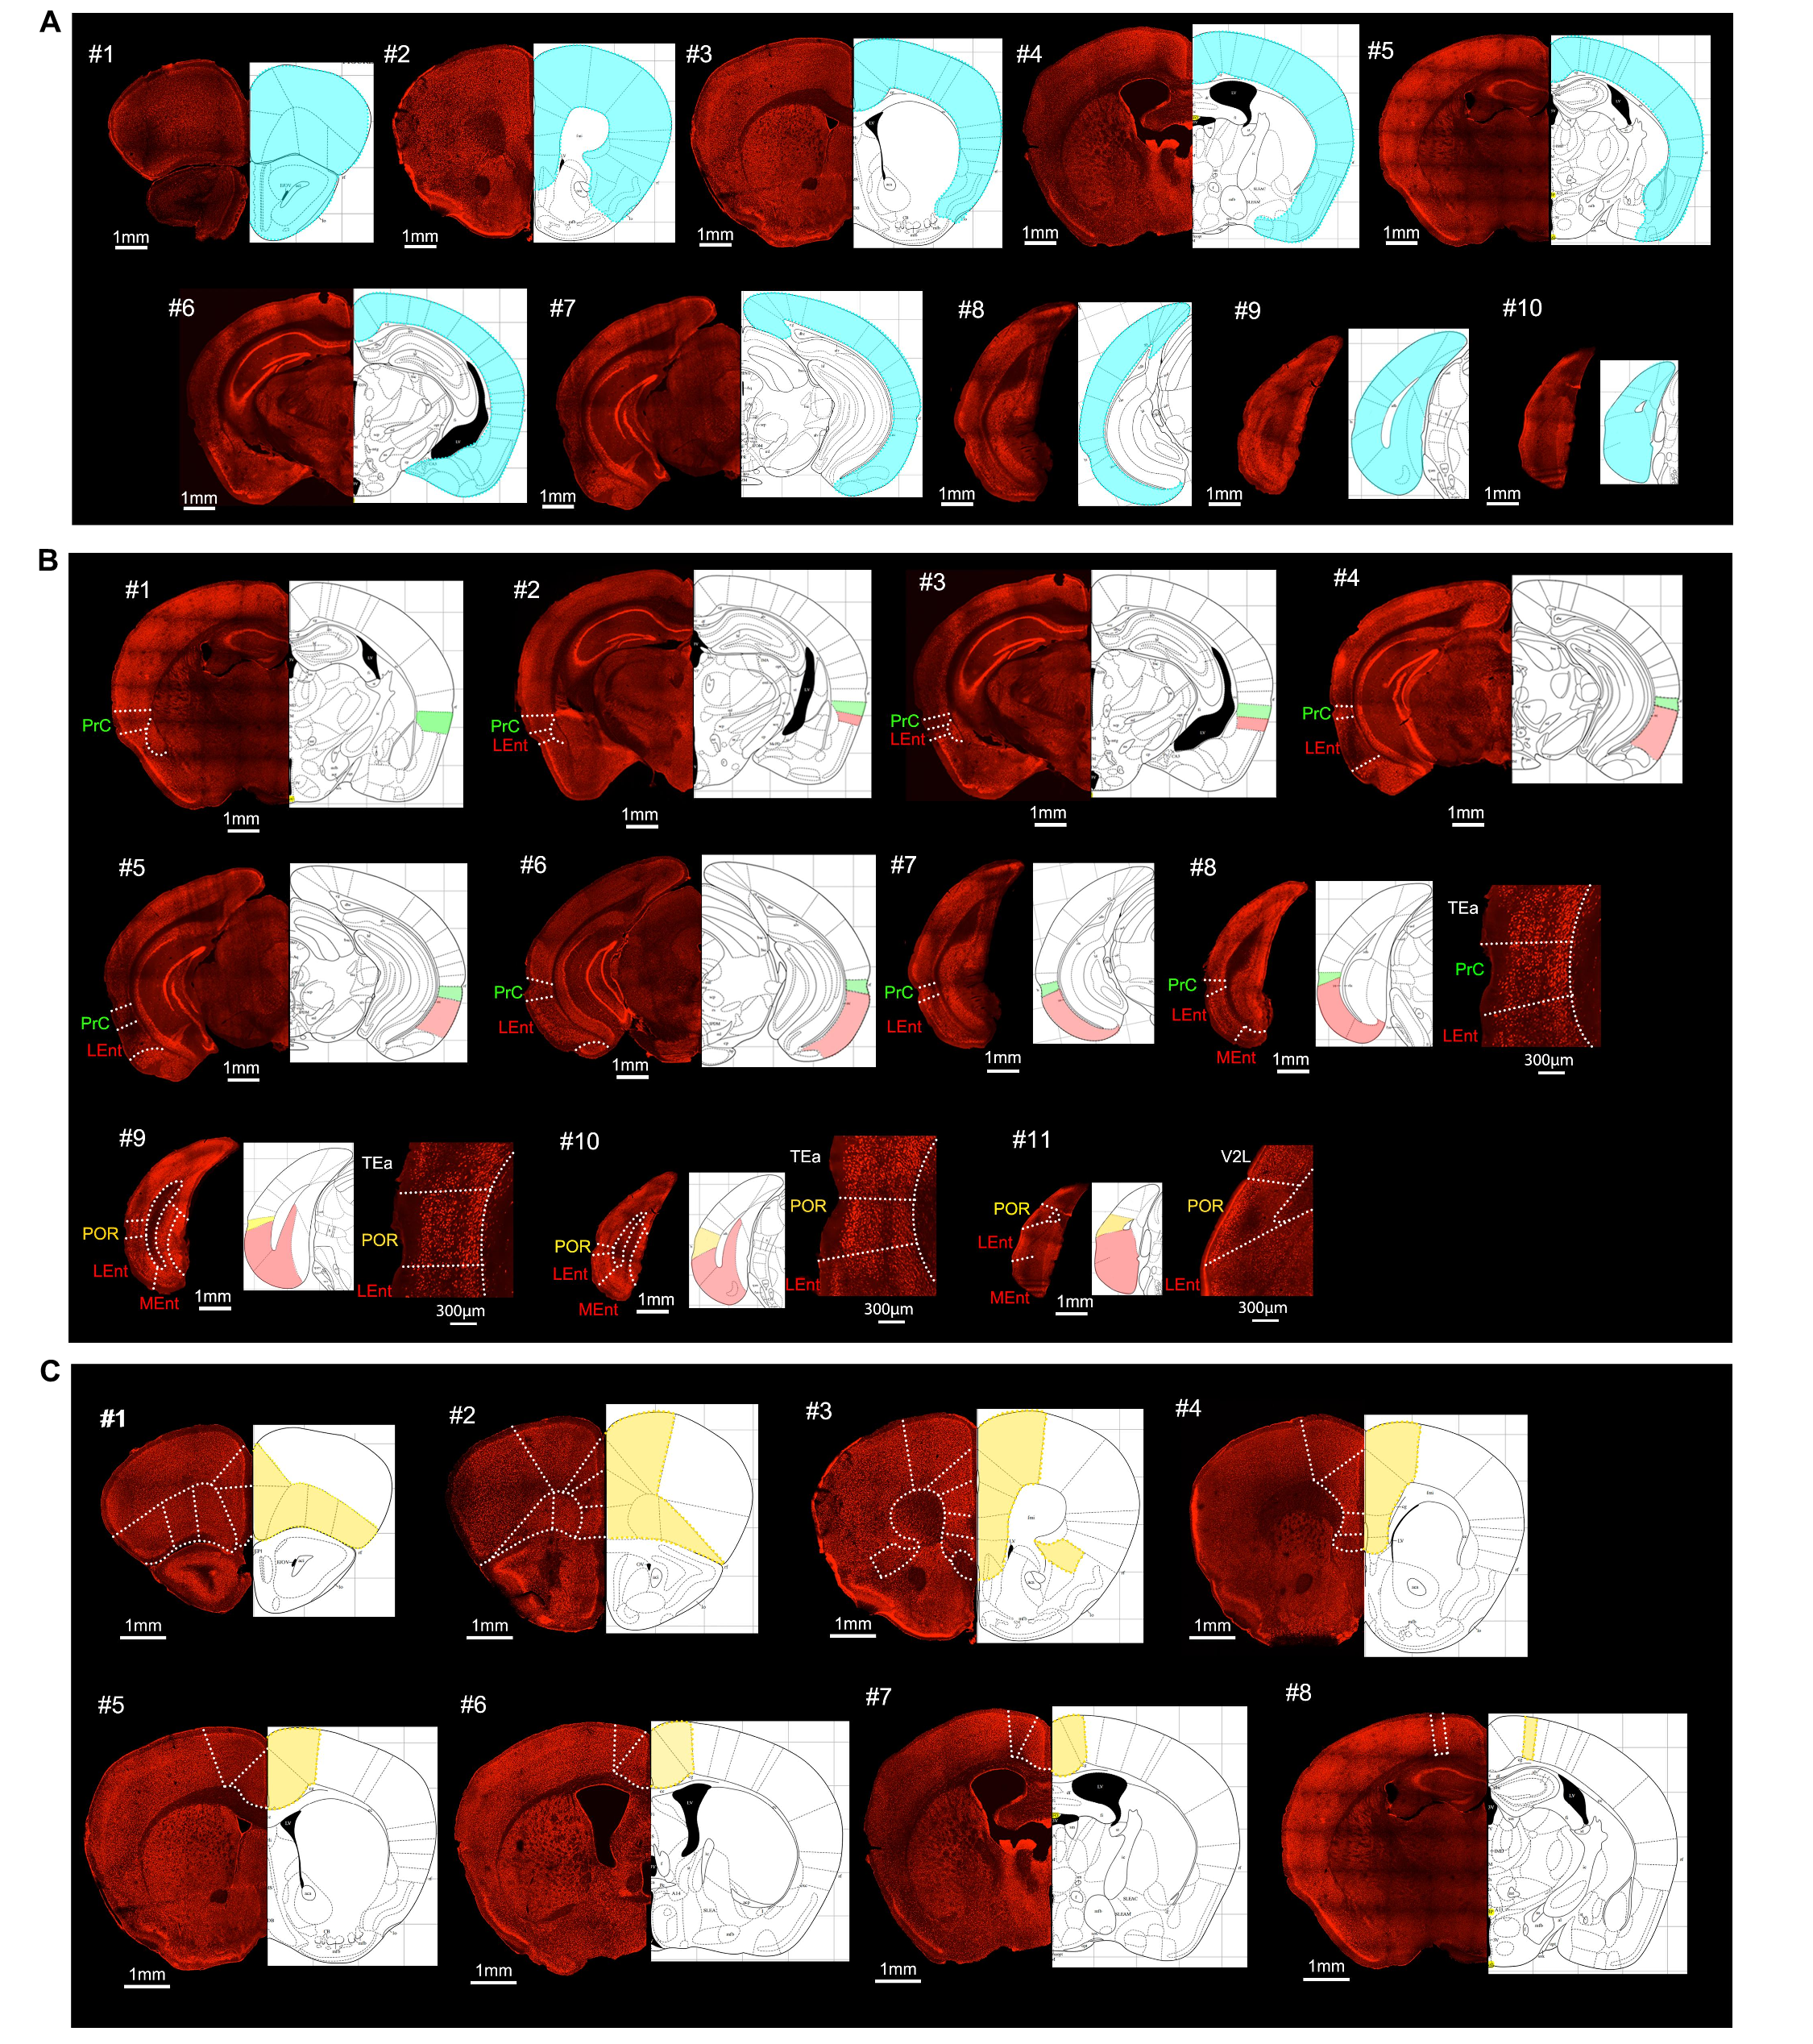


**Figure S1 (related to Figure 1). Anatomical boundaries of brain regions subjected to volumetric analysis. A** Representative NeuN-stained (red) sections showing the delineation of the cerebral cortex (blue) for volume measurement. **B** Representative NeuN-stained (red) sections illustrating the boundaries of the entorhinal cortex (Ent, red), perirhinal cortex (PrC, green), and postrhinal cortex (POR, yellow). **C** Representative NeuN-stained (red) sections showing the delineation of the prefrontal cortex (PFC, yellow).

**
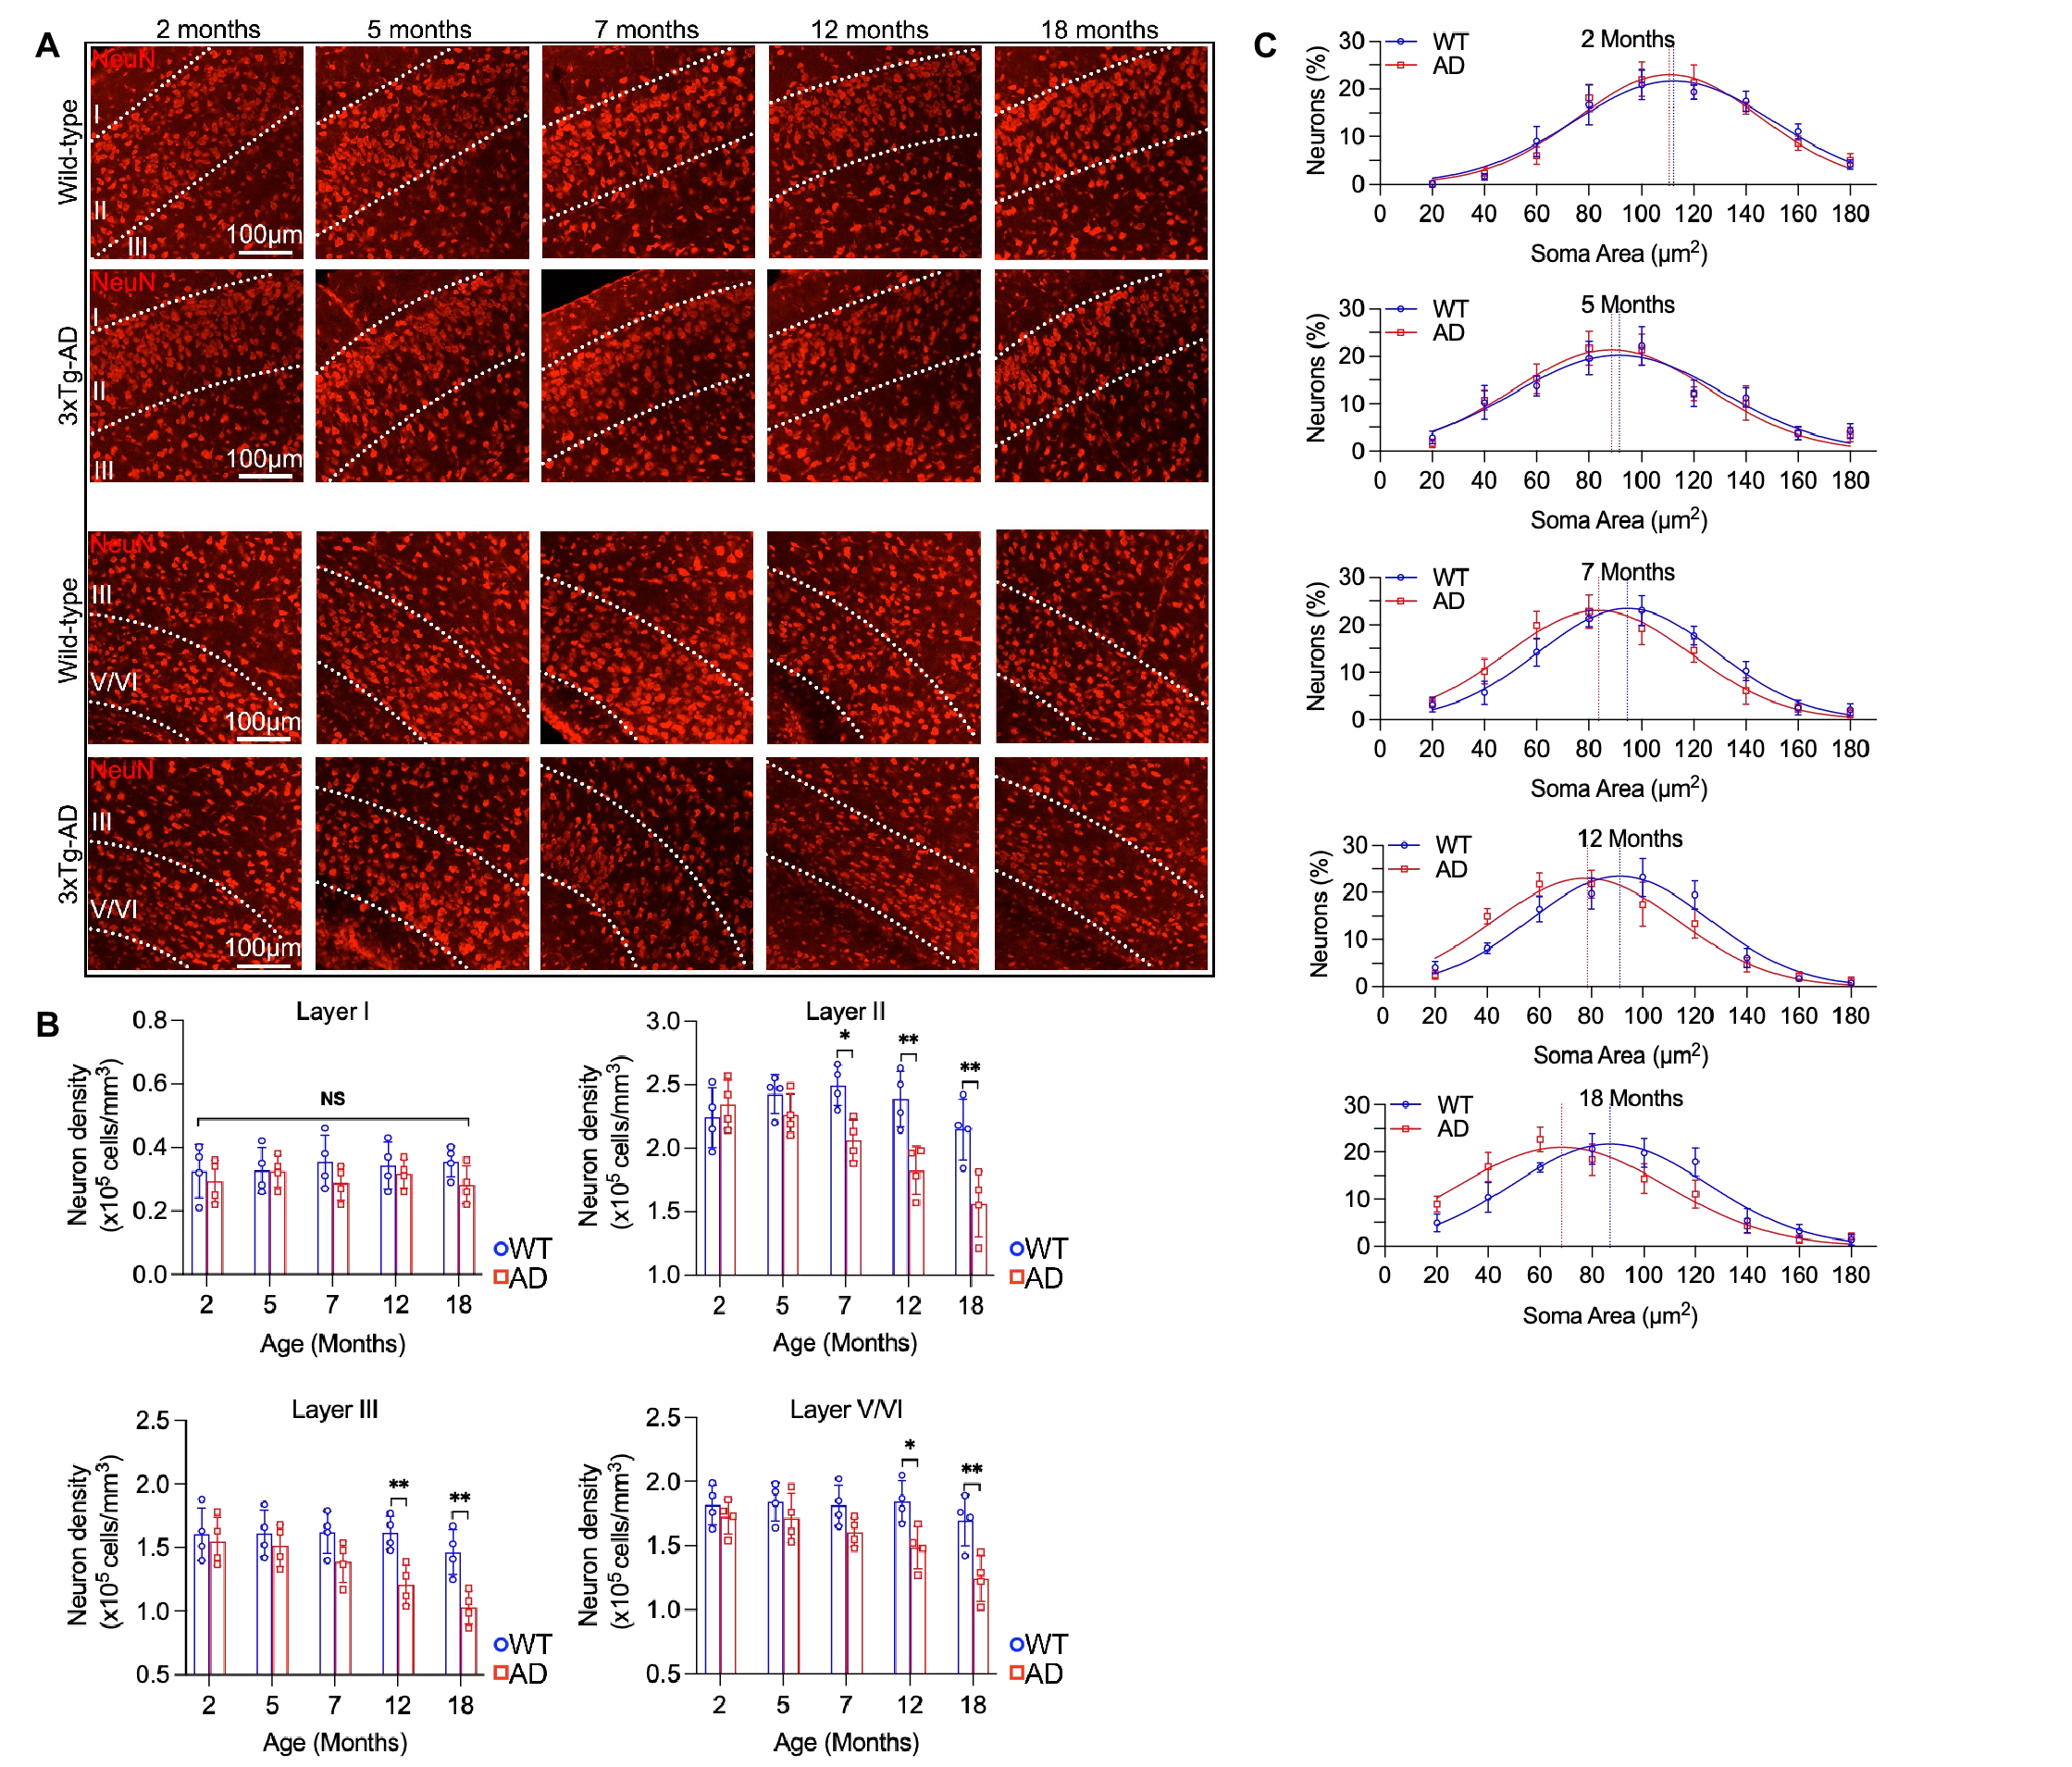
Figure S2 (related to Figure 2). Layer-specific and morphological analysis of Ent neurons during aging A** Representative images of NeuN+ (red) neurons across layers of the Ent in WT and 3xTg-AD mice at the indicated ages. Scale bar, 100 µm. **B** Layer-specific density (x105 cells/mm3) of NeuN+ neurons in the Ent.**C** Frequency distribution of neuronal soma sizes in the Ent of WT and 3xTg-AD mice across ages. Data are derived from *n* = 4 biologically independent mice per group. Technical replication details are provided in the **Methods** and **Table 1**. All data are presented as mean ± SD. Statistical analysis was performed by two-way RM ANOVA with Bonferroni’s post hoc test. ***P*<0.01, **P*<0.05, NS *P*>0.05.

**
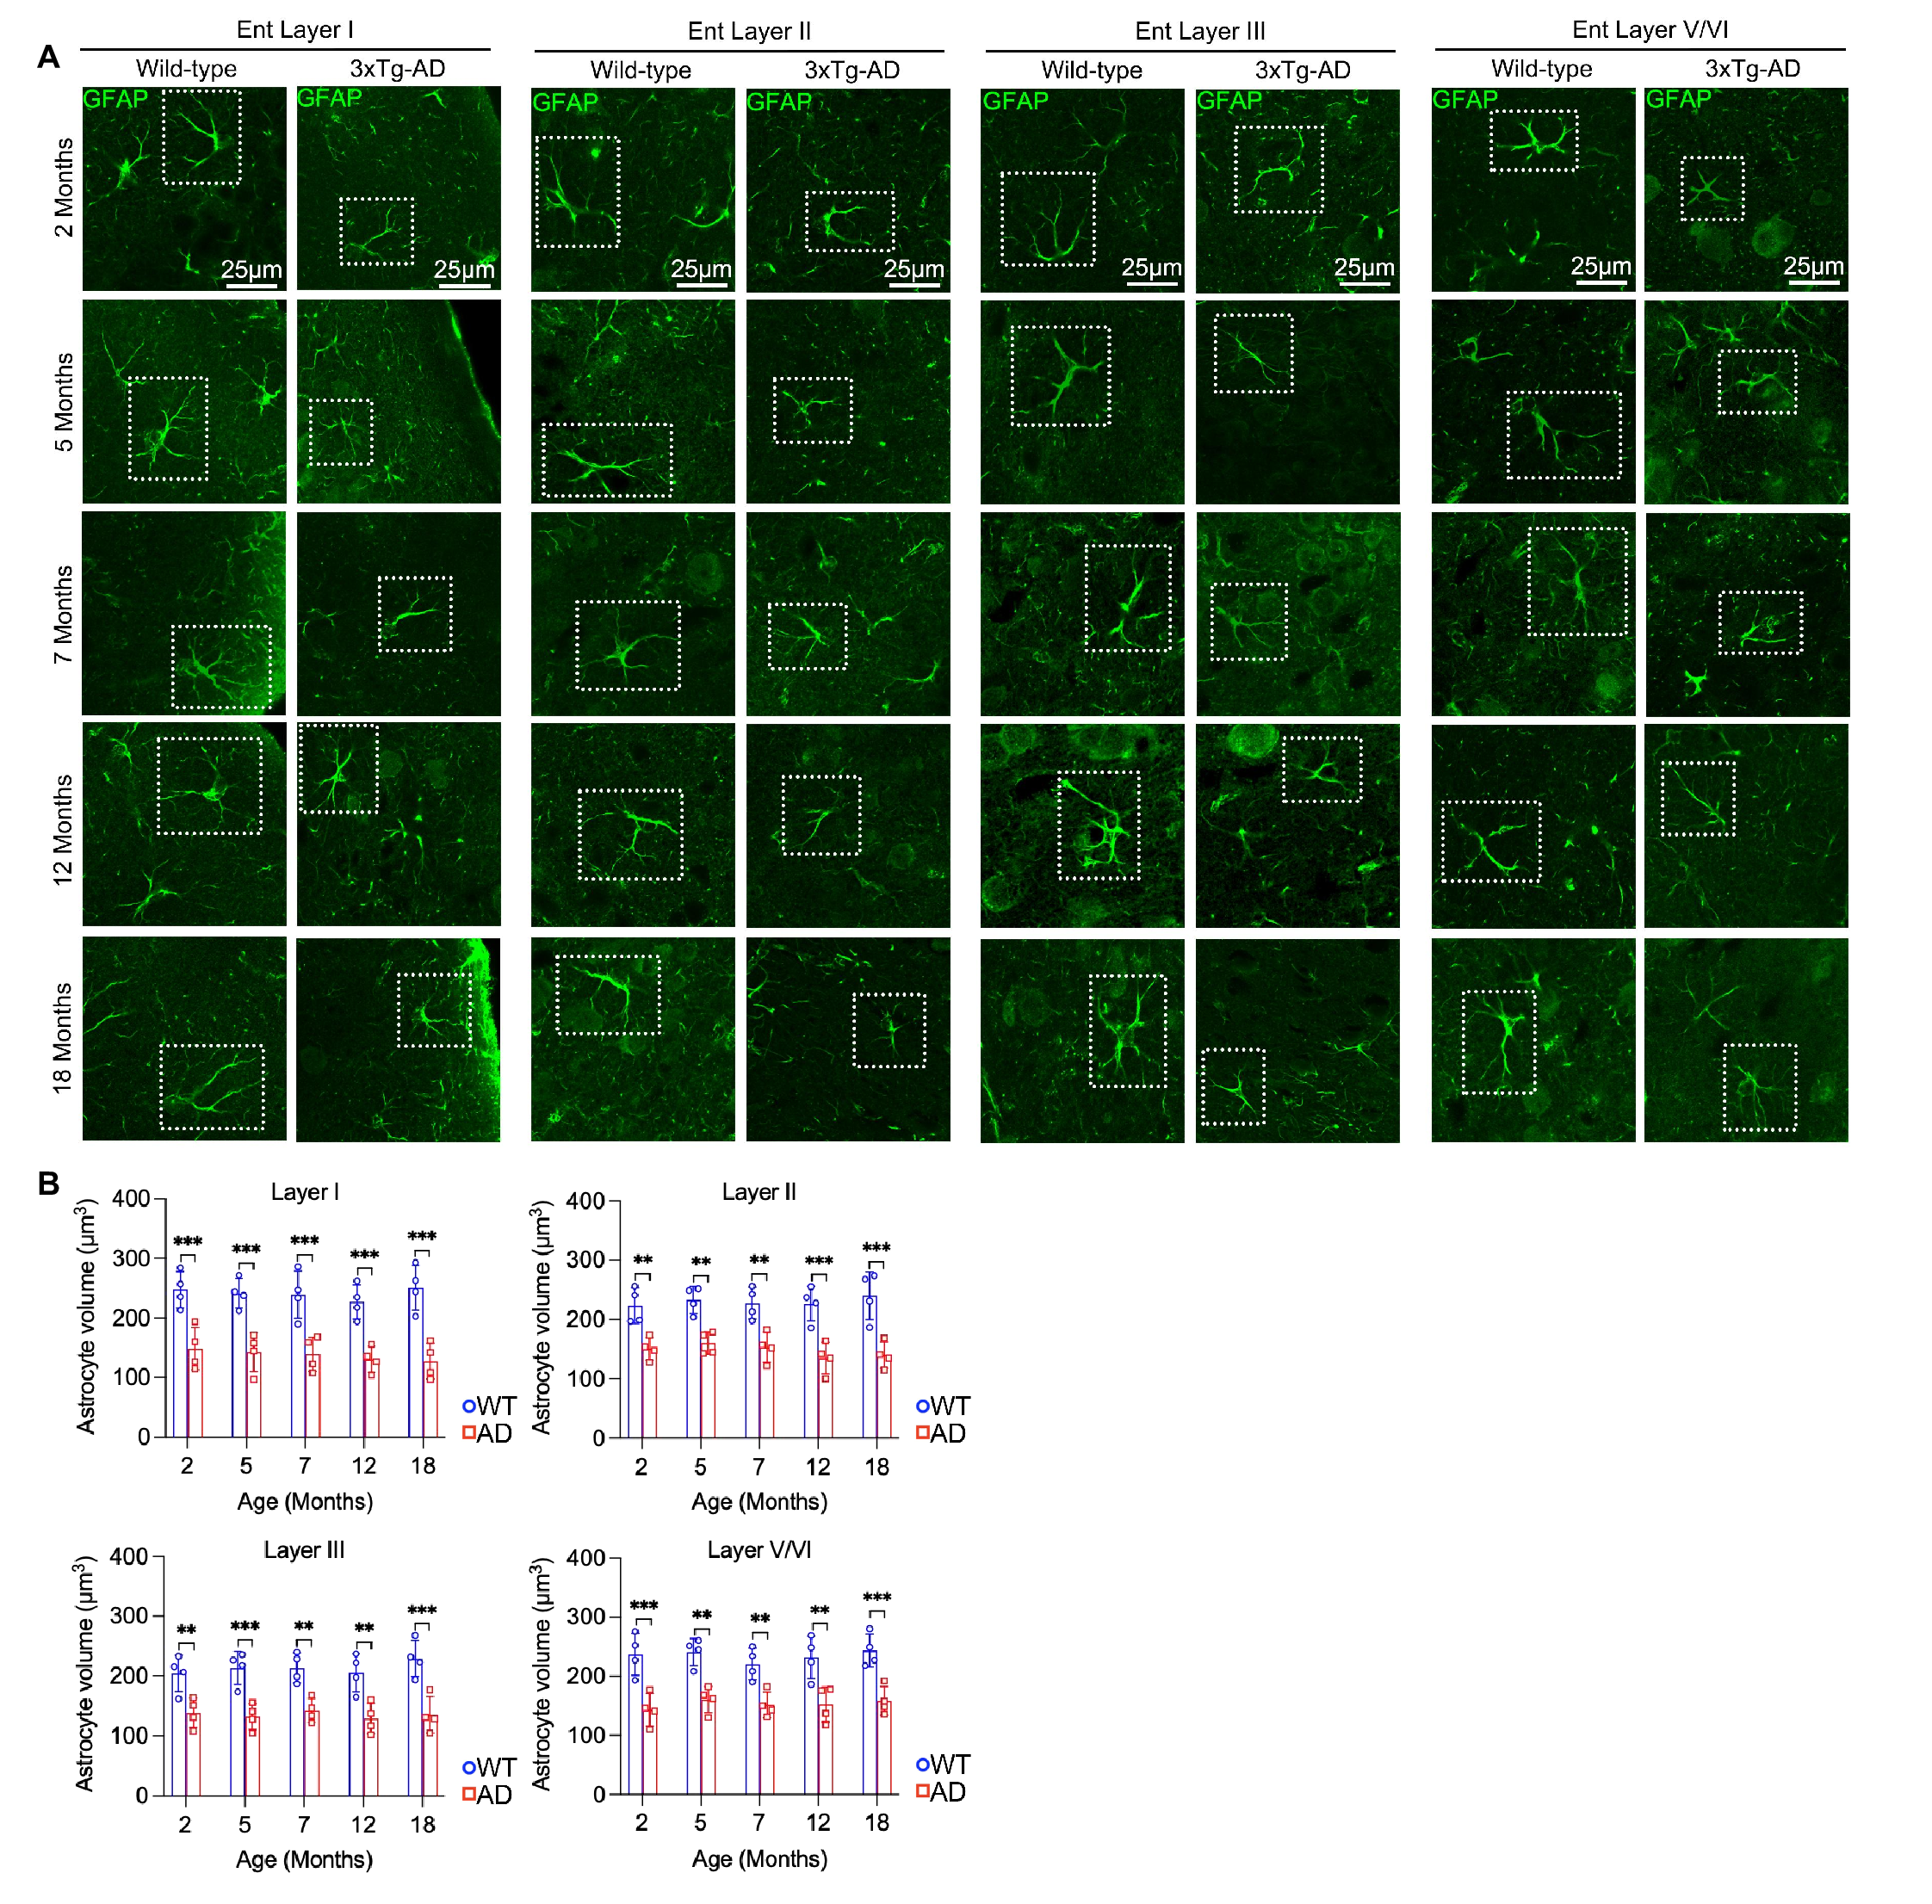
Figure S3 (related to Figure 2). Astrocytic morphological changes across Ent layers with age. A** Representative images of GFAP+ (green) astrocytes in Ent layers I, II, III, and V/VI from WT and 3xTg-AD mice across age. Scale bar, 25 µm. **B** Layer-specific volume (µm3) of GFAP+ astrocytes in the Ent. Data are derived from *n* = 4 biologically independent mice per group. Technical replication details are provided in the **Methods** and **Table 1**. Data are presented as mean ± SD. Statistical analysis was performed by two-way RM ANOVA with Bonferroni’s post hoc test. ****P*<0.001, ***P*<0.01, **P*<0.05, NS *P*>0.05.

**
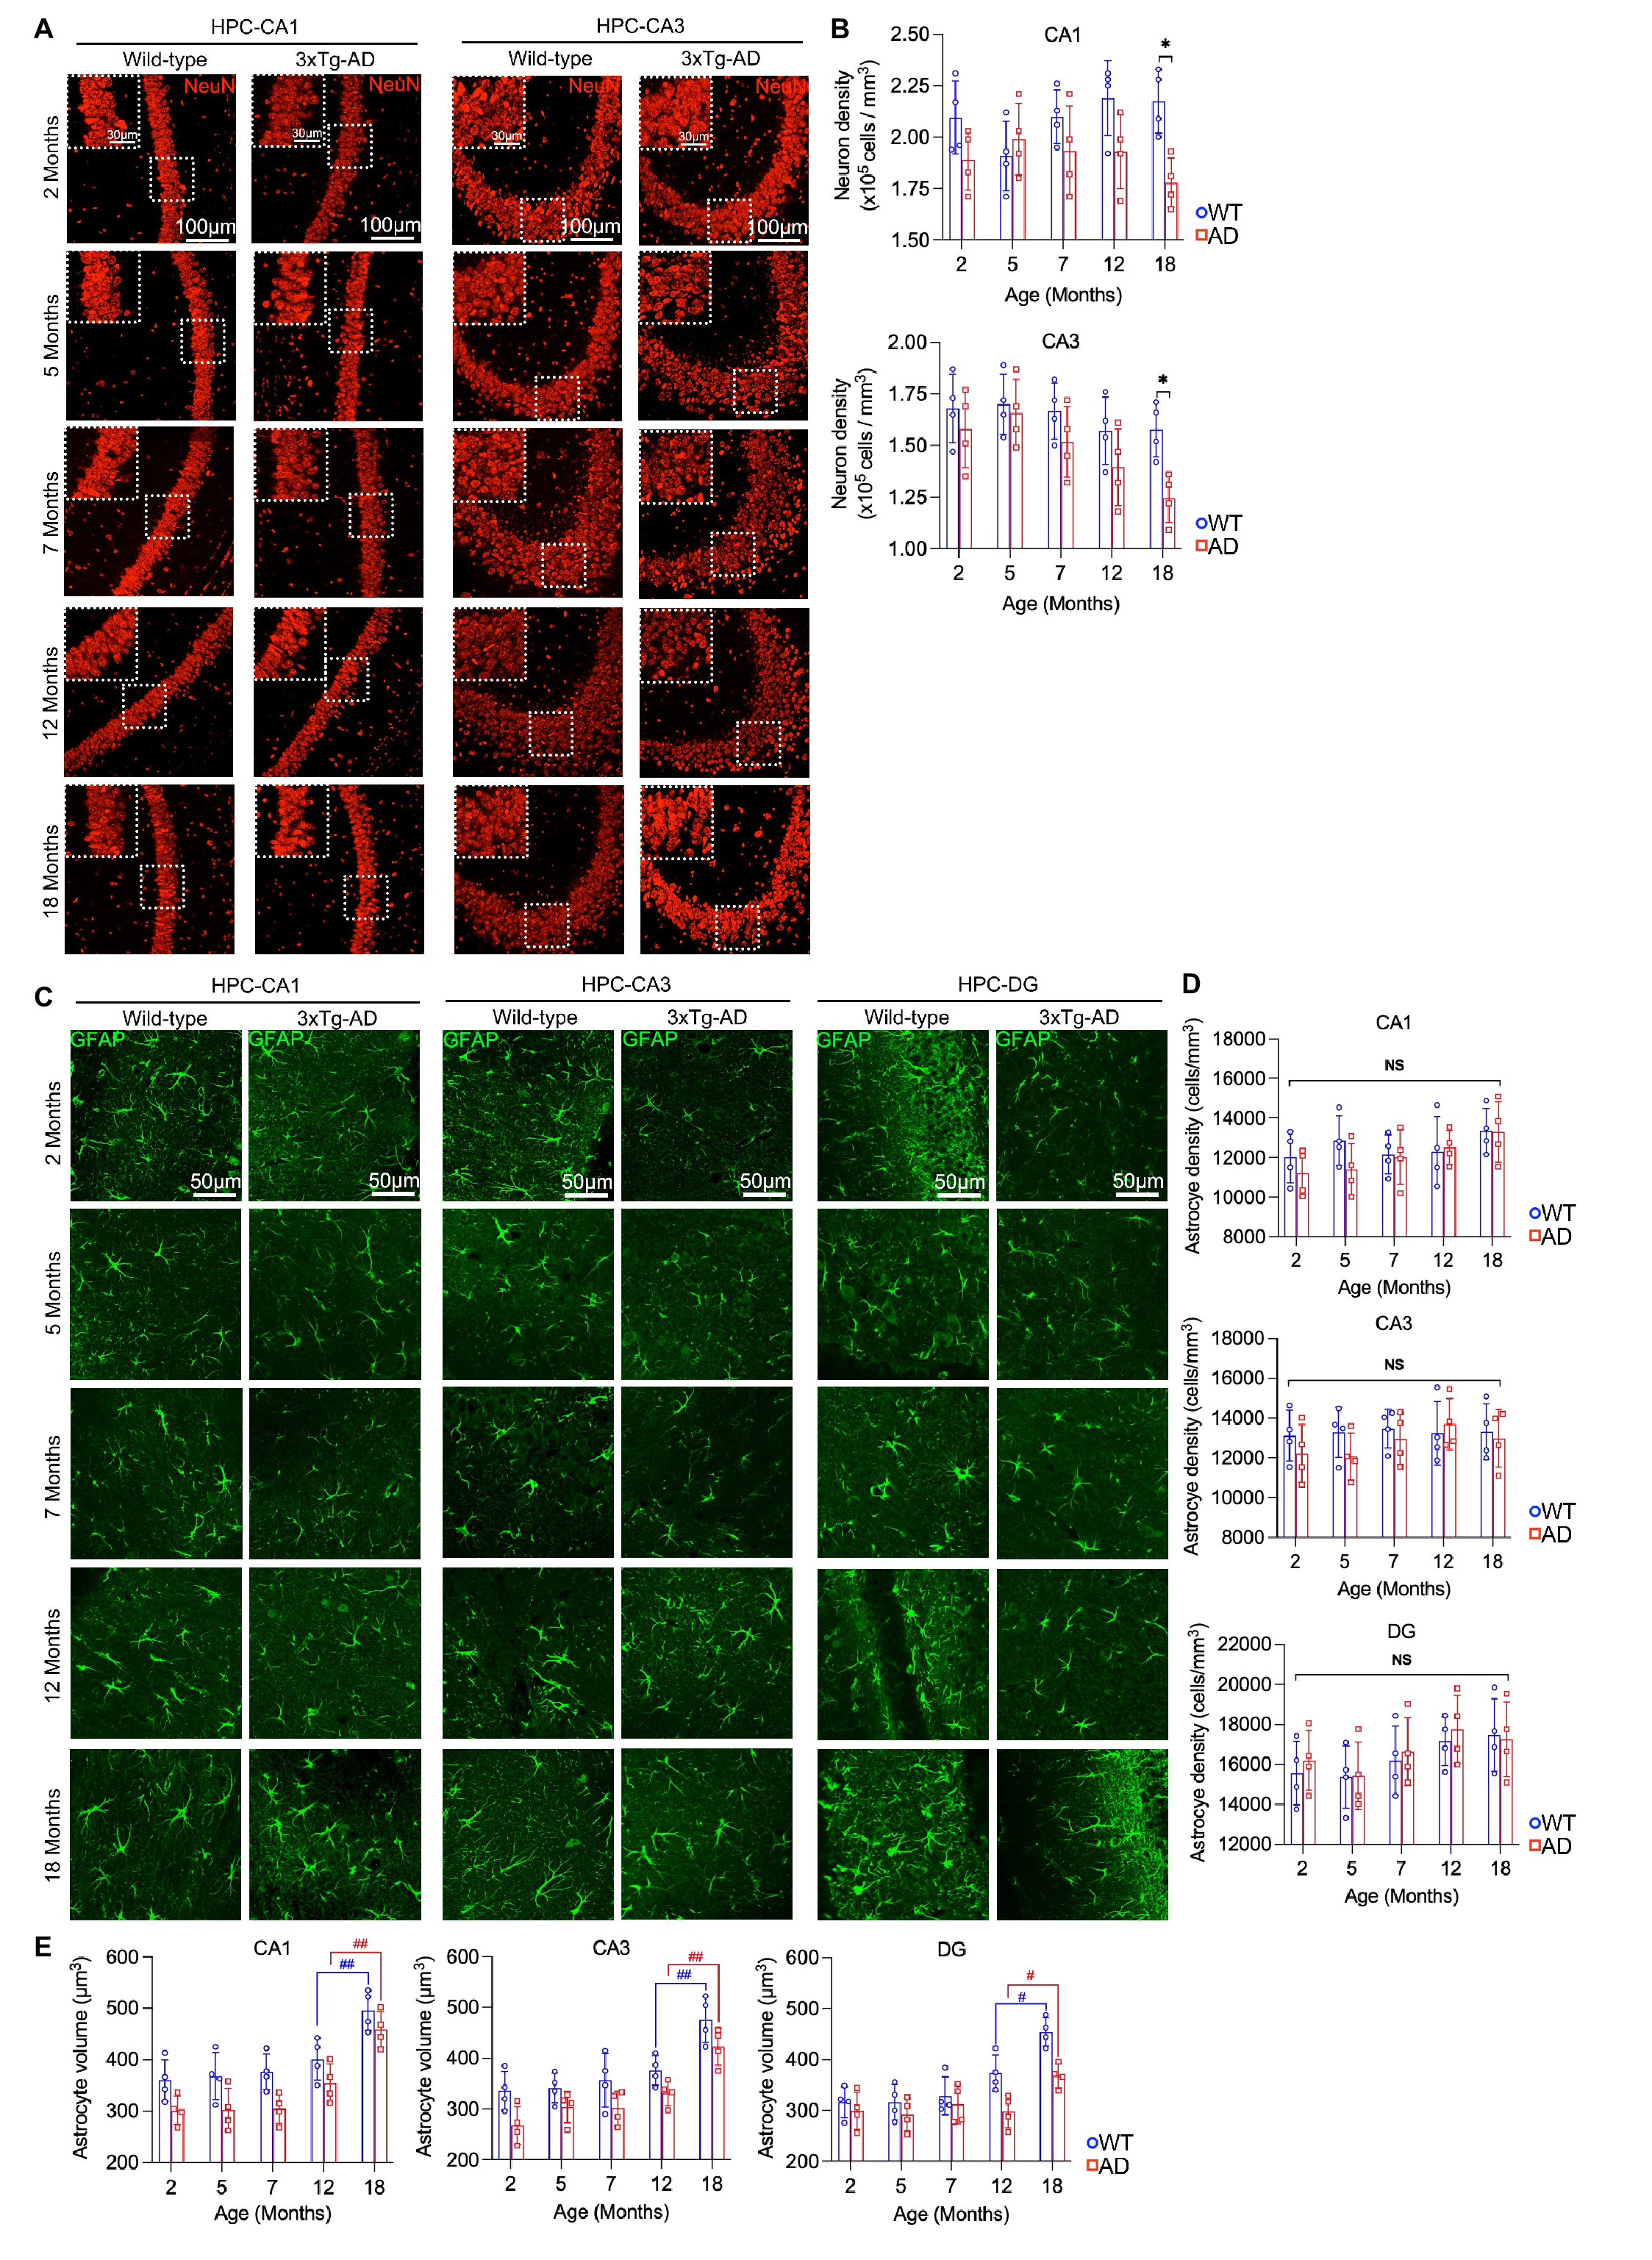
Figure S4 (related to Figure 3). Age-related changes in neuronal and astrocytic properties in the HPC. A** Representative images of NeuN+ (red) neurons in the hippocampal subregions CA1 and CA3 of WT and 3xTg-AD mice across ages. Scale bar, 100 µm; magnified images, 30 µm. **B** Density (x105 cells/mm3) of NeuN+ neurons in CA1 and CA3. **C** Representative images of GFAP+(green) astrocytes in CA1, CA3, and DG of WT and 3xTg-AD mice across ages. Scale bar, 50 µm. **D** Density (cells/mm3) of GFAP+ astrocytes in CA1, CA3, and DG.**E** Volume (µm3) of astrocytes in CA1, CA3, and DG. Data are derived from *n* = 4 biologically independent mice per group per age. Detailed information on technical replicates is provided in the **Methods** and **Table 1**. Data are presented as mean ± SD. Statistical significance was assessed by two-way RM ANOVA with Bonferroni’s post hoc test. **P* < 0.05 for between-genotype comparisons at the same age; ##*P* < 0.01, #*P* < 0.05 for within-genotype comparisons relative to the 12-month-old group. NS *P*>0.05.

**
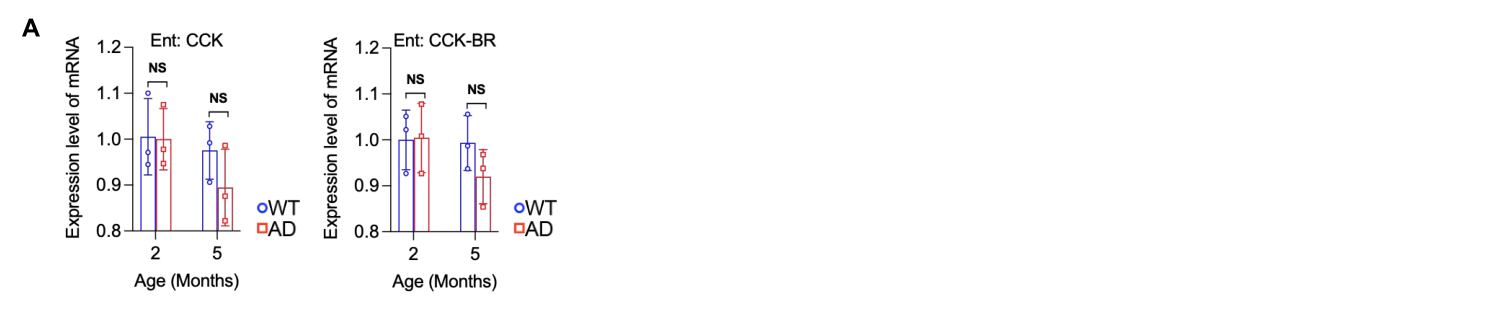
Figure S5 (related to Figure 4). CCK and CCK-BR mRNA expression in the entorhinal cortex of young WT and 3xTg-AD mice. A** CCK (left) and CCK-BR (right) mRNA levels in the Ent of WT and 3xTg-AD mice at 2 and 5 months of age. Gene expression was normalized to GAPDH and is presented as fold change relative to 2-month-old WT control (set to 1.0). Data are derived from *n* = 3 biologically independent mice per group; each sample was measured in technical triplicate, and the mean value was used for analysis. Due to the small sample size, statistical comparisons between 3xTg-AD and WT mice at each age were performed using the Mann-Whitney U test. NS *P* > 0.05.

**
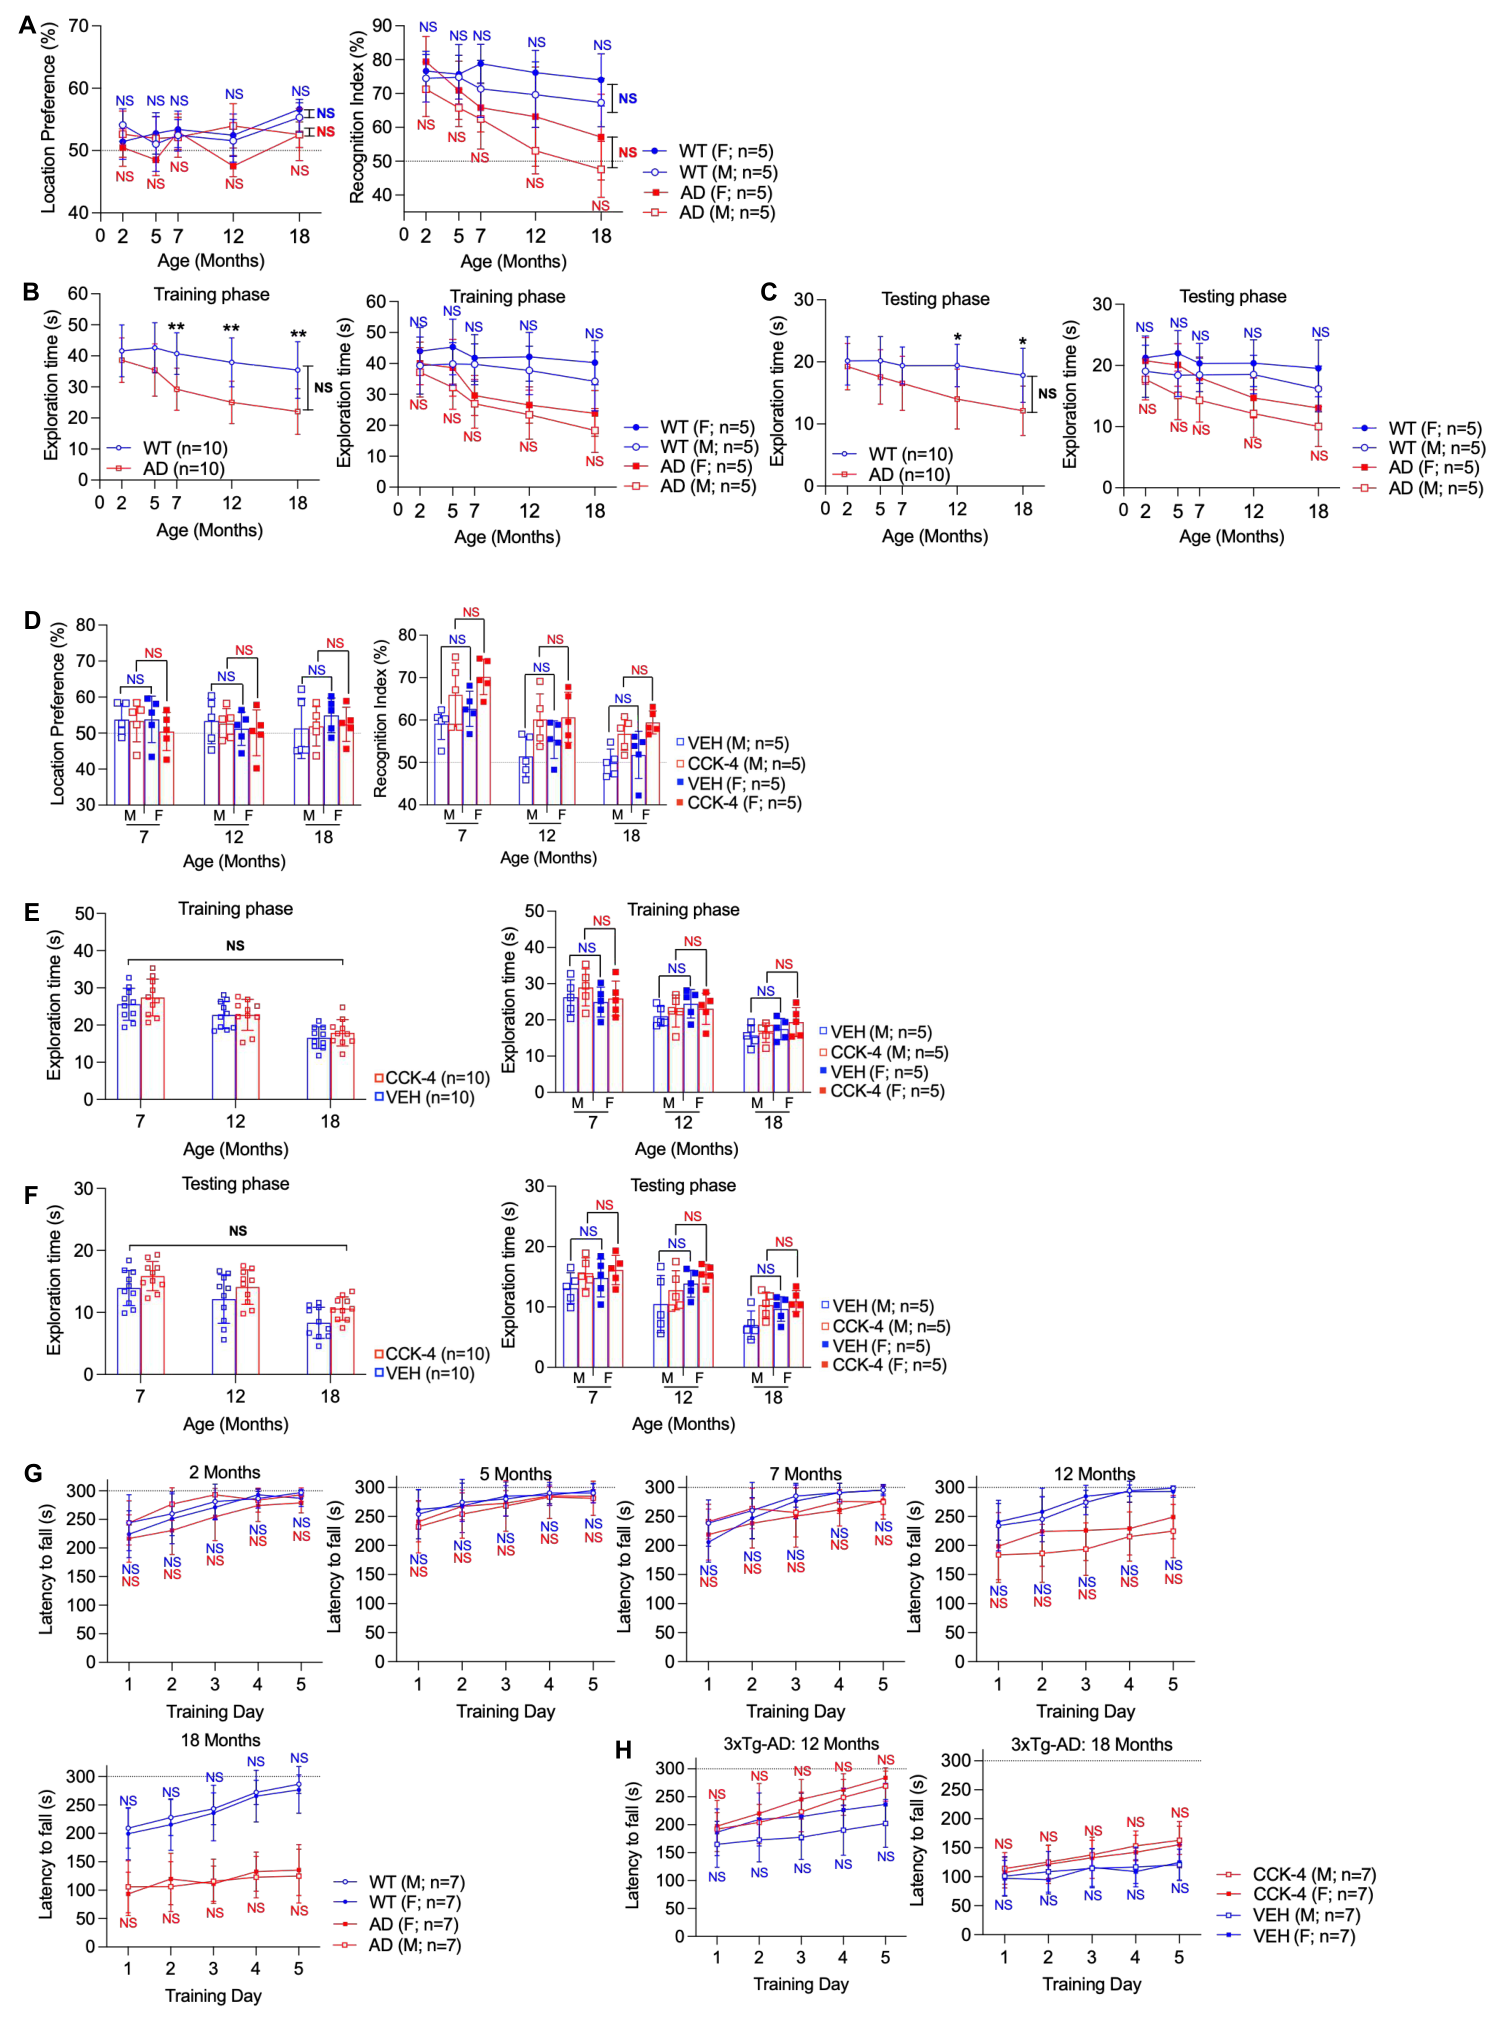
Figure S6 (related to Figure 5). Sex-grouped analysis of behavioral performance in NOR and rotarod tests. A** Sex-grouped NOR performance in 3xTg-AD and WT mice: location preference (left) and recognition index (right). **B-C** Total object exploration time during NOR training (**B**) and testing (**C**) in 3xTg-AD and WT mice: (left) sexes combined and (right) separated by sex. **D** Sex-grouped NOR performance in CCK-4- or VEH-treated 3xTg-AD mice at indicated ages: location preference (left) and recognition index (right). **E-F** Total object exploration time during NOR training (**E**) and testing (**F**) in CCK-4- or VEH-treated 3xTg-AD mice at indicated ages: (left) sexes combined and (right) separated by sex. **G** Sex-grouped daily latency to fall in the rotarod test of 3xTg-AD and WT mice. **H** Sex-grouped daily latency to fall in CCK-4- or VEH-treated 12- and 18-month-old 3xTg-AD mice.Sample sizes: For sexes-combined NOR data (left panels of **B**, **C**, **E**, **F**), *n* = 10 biologically independent mice per group. For sex-grouped NOR data, *n* = 5 mice per sex per group. For sex-grouped rotarod data, *n* = 7 mice per sex per group. Data are presented as mean ± SD. Statistical significance was assessed by two-way RM ANOVA with Bonferroni’s post hoc test. ****P*<0.001, ***P*<0.01, **P*<0.05; NS, not significant.

**
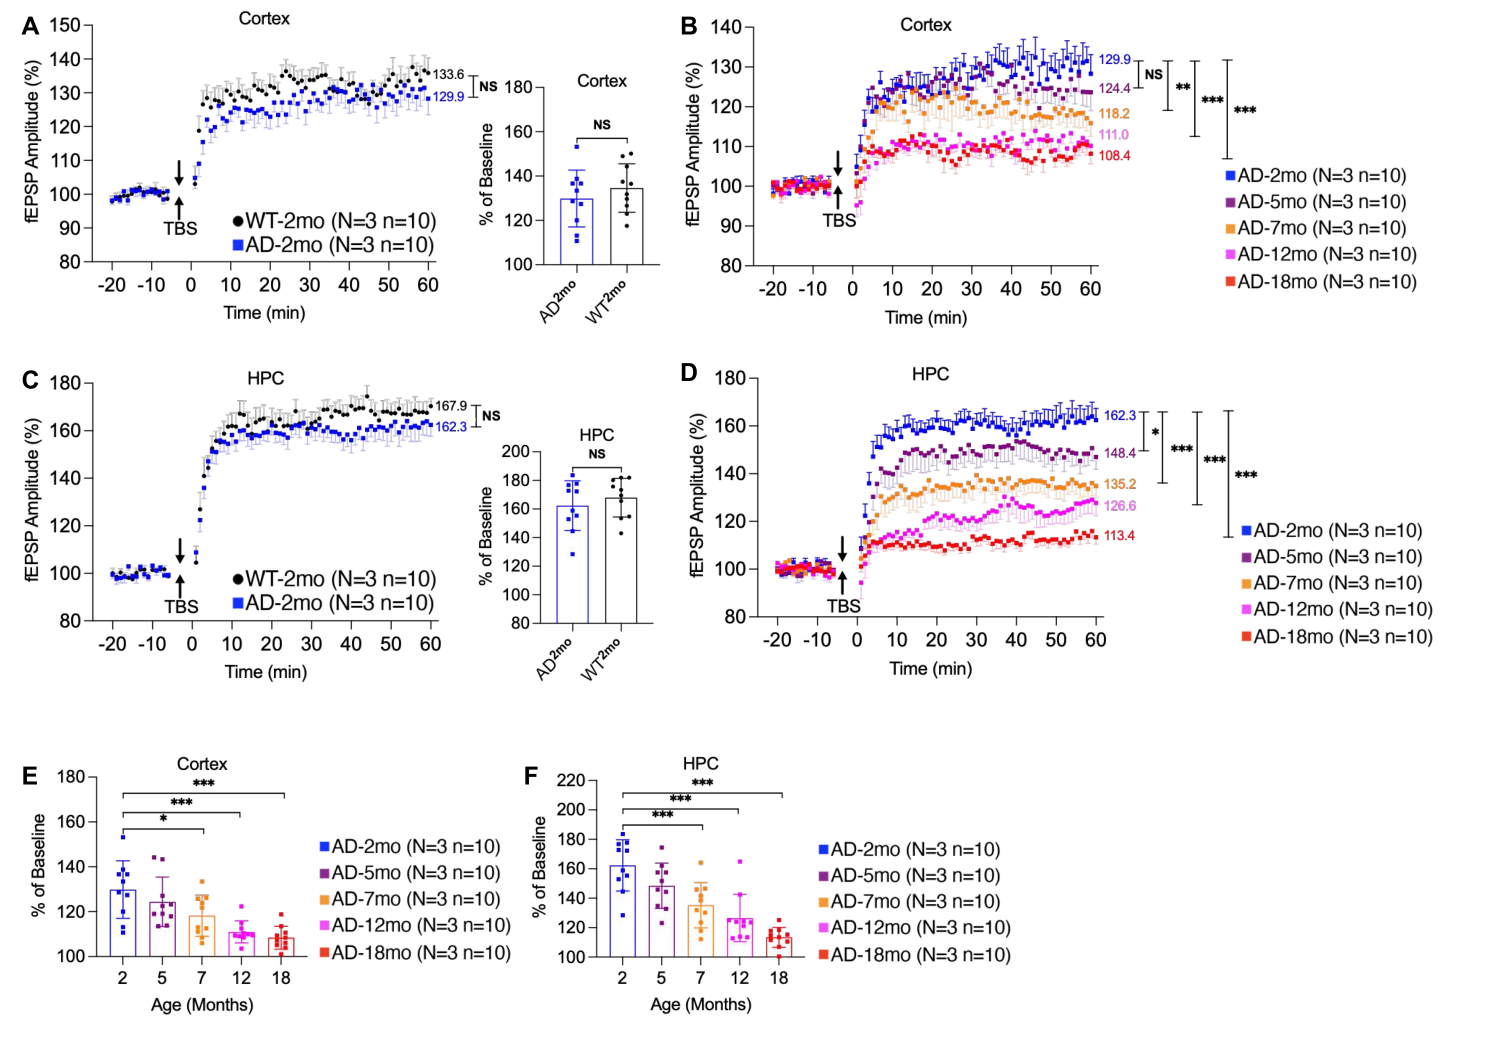
Figure S7 (related to Figure 6). Age-dependent synaptic plasticity deficits in cortical and hippocampal circuits of 3xTg-AD mice. A, C** (Left) Scatter plots of normalized fEPSP amplitudes before and after TBS (arrows) in cortical (**A**) and hippocampal (**C**) slices from 2-month-old WT and 3xTg-AD mice. (Right) Summary bar charts of normalized fEPSP amplitudes averaged over the last 15 minutes of recordings. **B, D** Scatter plots of normalized fEPSP amplitudes before and after TBS (arrows) in cortical (**B**) and hippocampal (**D**) slices from 5-, 7-, 12-, and 18-month-old 3xTg-AD mice, compared to 2-month-old 3xTg-AD mice. **E-F** Summary bar charts of normalized fEPSP amplitudes averaged over the last 15 minutes of recordings in cortical (**E**) and hippocampal (**F**) slices of 2-, 5-, 7-, 12-, and 18-month-old 3xTg-AD mice. Sample sizes: *N* = 4 mice per group per age were used, with 3 slices recorded per mouse (total *n* = 12 slices per group). For all scatter plots, data are presented as mean ± SEM. For all bar charts, data are presented as mean ± SD. Statistical analysis: Statistical significance of all scatter plots was assessed by two-way RM ANOVA with Bonferroni’s post hoc test. Bar charts in (**A)** and **(C**) met assumptions of normality (Shapiro-Wilk test) and homogeneity of variances (Levene’s test) and were analyzed by two-tailed unpaired Student’s t-test. Bar charts in (**E)** and **(F**) were analyzed by ordinary one-way ANOVA with post hoc Dunnett’s test relative to the 2-month-old 3xTg-AD group. The significance markers at the right side of the curves in (**A**, **C**) and (**B**, **D**) denote the “genotype × time” and “age × time” interaction effects on fEPSP amplitude, respectively, reflecting statistically divergent time courses of potentiation across genotypes or ages in 3xTg-AD mice. ****P*<0.001, ***P*<0.01, **P*<0.05; NS, not significant.

[**Table S1**](https://static-content.springer.com/esm/art:10.1038/s43587-024-00798-7/MediaObjects/43587_2024_798_MOESM3_ESM.pdf)**. List of primers used for quantitative real-time PCR assays.**

| **mRNA** | **Source** | **Sequence** |
| --- | --- | --- |
| Gapdh (Forward) | General Biol | 5'-AGGTCGGTGTGAACGGATTTG-3' |
| Gapdh (Reverse) | General Biol | 5'-TGTAGACCATGTAGTTGAGGTCA-3' |
| CCK (Forward) | General Biol | 5'-GCACTGCTAGCGCGATACATC-3' |
| CCK (Reverse) | General Biol | 5'-CCAGGCTCTGCAGGTTCTTAAG**-**3' |
| CCKBR (Forward) | General Biol | 5'-ACCCTTTATGCGGTGATCTTTC**-**3' |
| CCKBR (Reverse) | General Biol | 5'-GGTGACCGTTCTTAGGCGTC-3' |
| BDNF (Forward) | General Biol | 5'-TCATACTTCGGTTGCATGAAGG-3' |
| BDNF (Reverse) | General Biol | 5'-ACACCTGGGTAGGCCAAGTT-3' |
| GAD1 (Forward) | General Biol | 5'-AACGTATGATACTTGGTGTGGC-3' |
| GAD1 (Reverse) | General Biol | 5'-CCAGGCTATTGGTCCTTTGTAAG-3' |
| SLC1A2 (Forward) | General Biol | 5'-GCCAACAATATGCCCAAGCAG-3' |
| SLC1A2 (Reverse) | General Biol | 5'-GACACCAAACACAGTCAGTGA-3' |
| SYN1 (Forward) | General Biol | 5'-CCAATCTGCCGAATGGGTACA-3' |
| SYN1 (Reverse) | General Biol | 5'-GCGTTAGACAGCGACGAGAA-3' |

**Table S2. List of Reagents and Resources.**

| **Reagent type (species) or resource** | **Designation** | **Source** | **Identifiers** | **Additional information** |
| --- | --- | --- | --- | --- |
| Primary Antibody | Anti-NeuN  (Rabbit polyclonal) | Thermo Fisher Scientific | Cat# PA5-78499,  RRID: AB_2736206 | IF (1:1000) |
| Primary Antibody | Anti-GFAP  (Rabbit polyclonal) | Thermo Fisher Scientific | Cat# PA1-10019,  RRID: AB_1074611 | IF (1:1000) |
| Primary Antibody | Anti-Iba1  (Rat polyclonal) | Fujifilm Wako | Cat# 019-19741,  RRID: AB_839504 | IF (1:500) |
| Primary Antibody | Anti-DCX  (Rabbit polyclonal) | Abcam | Cat# ab18723,  RRID: AB_732011 | IF (1:1000) |
| Primary Antibody | Anti-PSD95  (Rabbit polyclonal) | Thermo Fisher Scientific | Cat# 51-6900,  RRID: AB_2533914 | IF (1:1000) |
| Primary Antibody | Anti-Phospho-Tau (AT8) (Mouse Monoclonal) | Thermo Fisher Scientific | Cat# MN1020,  RRID: AB_223647 | IF (1:100) |
| Primary Antibody | Anti-β-Amyloid (6e10)  (Mouse Monoclonal) | Biolegend | Cat# 803001,  RRID: AB_2564653 | IF (1:100) |
| Secondary Antibody | Goat anti-Rabbit IgG, Alexa FluorTM 594 | Thermo Fisher Scientific | Cat# A-11012,  RRID: AB_2534079 | IF (1:1000) |
| Secondary Antibody | Goat anti-Rabbit IgG, Alexa FluorTM 488 | Thermo Fisher Scientific | Cat# A-11008,  RRID: AB_143165 | IF (1:1000) |
| Secondary Antibody | Donkey anti-Rat IgG, Alexa FluorTM 594 | Thermo Fisher Scientific | Cat# A-21209,  RRID: AB_2535795 | IF (1:1000) |
| Secondary Antibody | Donkey anti-Mouse IgG, Alexa FluorTM 647 | Thermo Fisher Scientific | Cat# A-31571,  RRID: AB_162542 | IF (1:1000) |
| RNAscope™ Probe | Mm-Gad1-C3 | ACDBio | Cat# 400951-C3 | N/A |
| RNAscope™ Probe | Mm-Slc17a7-O2 | ACDBio | Cat# 501101 | N/A |
| Chemical compound, drug | CCK-4 | Abcam | Cat# ab141328 | N/A |
| Chemical compound, drug | HT-267 | Self-developed | N/A | N/A |
| Reagent Kit | PrimeScriptTM RT Reagent Kit | Takara Bio | Cat# RR037B | N/A |
| Reagent Kit | RNAscope® Multiplex Fluorescent Reagent Kit v2 | ACD Bio | Cat# 323110 | N/A |
| Genetic reagent (Mus musculus) | Mouse: 129S1 | Jackson Laboratories | Strain:#002448  RRID:IMSR_JAX:002448 | N/A |
| Genetic reagent (Mus musculus) | Mouse: 3xTg-AD | Jackson Laboratories | Strain:#034830-JAX  RRID:MMRRC_034830-JAX | N/A |
| Software | ImageJ | National Institutes of Health | <https://imagej.net/ij/> | N/A |
| Software | Photoshop CC | Adobe | <https://www.adobe.com/products/photoshop.html> | N/A |
| Software | MED64 Mobius Software | Alpha MED Scientific Inc | <https://www.med64.com/products/med64-mobius-software/> | N/A |
| Software | SMART v3.0 | Harvard Apparatus | <https://www.panlab.com/en/products/smart-video-tracking-software-panlab> | N/A |
| Software | Prism | GraphPad Software | <https://www.graphpad.com/features> | N/A |
| Software | MED64 Multielectrode Array System | Alpha MED Scientific Inc. | <https://www.med64.com> | N/A |
| Software | QuantStudio™ 3 Real-Time PCR System | Thermo Fisher Scientific | <https://www.thermofisher.com/order/catalog/product/A28567> | N/A |
