# Supplementary material for: Entorhinal cholecystokinin in Alzheimer’s disease: its earliest vulnerability and rescue effects across different disease stages
Source: Research Square preprint supplement (doi:10.21203/rs.3.rs-7630814/v1), 2025-10-29
Supplement: Supplementary file 2 [file 7017de51e42d5a1240a4a57d.xlsx]

## Sheet: Fig.1
Summary of Statistical Analysis for Figure 1							Post-hoc Comparisons for Figure 1
Figure	Source of Variation	F (DFn, DFd)	P value	P value summary	Analysis Method		Figure		Time point	P value summary	P value	Analysis Method		In Figure 1, ***P<0.001, **P<0.01, *P<0.05, ###P<0.001, ##P<0.01, #P<0.05, ns P>0.05 by two-way RM ANOVA with post hoc Bonferroni’s test.
Figure 1C	Interaction	F (4, 30) = 2.231	0.0893	ns	Two-way RM ANOVA with post hoc Bonferroni’s test		Figure 1C	WT-AD	2mo	ns	0.9881	Two-way RM ANOVA with post hoc Bonferroni’s test
	Row Factor	F (4, 30) = 2.997	0.0341	*					5mo	ns	0.9534
	Column Factor	F (1, 30) = 17.92	0.0002	***					7mo	ns	0.5501
Figure 1E	Interaction	F (4, 30) = 2.535	0.0607	ns					12mo	ns	0.0898
	Row Factor	F (4, 30) = 2.293	0.0825	ns					18mo	**	0.0011
	Column Factor	F (1, 30) = 20.47	<0.0001	***			Figure 1E	WT-AD	2mo	ns	0.9936
Figure 1F	Interaction	F (4, 30) = 1.343	0.277	ns					5mo	ns	0.9474
	Row Factor	F (4, 30) = 2.342	0.0776	ns					7mo	ns	0.2668
	Column Factor	F (1, 30) = 12.24	0.0015	**					12mo	ns	0.1015
Figure 1G	Interaction	F (4, 30) = 2.236	0.0888	ns					18mo	***	0.0005
	Row Factor	F (4, 30) = 4.837	0.0039	**			Figure 1F	WT-AD	2mo	ns	0.9906
	Column Factor	F (1, 30) = 31.96	<0.0001	***					5mo	ns	0.97
Figure 1H	Interaction	F (4, 30) = 6.315	0.0008	***					7mo	ns	0.7139
	Row Factor	F (4, 30) = 14.97	<0.0001	***					12mo	ns	0.2319
	Column Factor	F (1, 30) = 87.59	<0.0001	***					18mo	*	0.011
Figure 1I	Interaction	F (4, 30) = 4.250	0.0076	**			Figure 1G	WT-AD	2mo	ns	0.931
	Row Factor	F (4, 30) = 4.366	0.0067	**					5mo	ns	0.4224
	Column Factor	F (1, 30) = 34.46	<0.0001	***					7mo	ns	0.1929
Figure 1J	Interaction	F (4, 30) = 2.850	0.0409	*					12mo	*	0.0102
	Row Factor	F (4, 30) = 3.936	0.011	*					18mo	***	0.0003
	Column Factor	F (1, 30) = 13.26	0.001	**				WT-WT	2mo vs. 5mo	ns	0.9948
Figure 1K	Interaction	F (4, 40) = 1.043	0.3973	ns					2mo vs. 7mo	ns	0.9638
	Row Factor	F (4, 40) = 4.789	0.003	**					2mo vs. 12mo	ns	0.9941
	Column Factor	F (1, 40) = 49.11	<0.0001	***					2mo vs. 18mo	ns	0.9687
Figure 1L	Interaction	F (4, 30) = 1.943	0.1289	ns				AD-AD	2mo vs. 5mo	ns	0.9905
	Row Factor	F (4, 30) = 2.958	0.0358	*					2mo vs. 7mo	ns	0.9674
	Column Factor	F (1, 30) = 26.15	<0.0001	***					2mo vs. 12mo	ns	0.2286
Figure 1M (left: HPC vs. Cortex)	Interaction	F (4, 35) = 2.854	0.0379	*					2mo vs. 18mo	***	0.001
	Row Factor	F (4, 35) = 3.272	0.0222	*			Figure 1H	WT-AD	2mo	ns	0.7533
	Column Factor	F (1, 35) = 40.54	<0.0001	***					5mo	ns	0.0748
Figure 1M (left: HPC vs. Ent)	Interaction	F (4, 35) = 4.068	0.0082	**					7mo	**	0.0036
	Row Factor	F (4, 35) = 2.433	0.0657	ns					12mo	***	<0.0001
	Column Factor	F (1, 35) = 55.12	<0.0001	***					18mo	***	<0.0001
Figure 1M (left: Ent vs. Cortex)	Interaction	F (4, 30) = 0.1976	0.9377	ns				WT-WT	2mo vs. 5mo	ns	>0.9999
	Row Factor	F (4, 30) = 1.602	0.1996	ns					2mo vs. 7mo	ns	>0.9999
	Column Factor	F (1, 30) = 1.682	0.2045	ns					2mo vs. 12mo	ns	0.9998
Figure 1M (right: HPC vs. Cortex)	Interaction	F (4, 35) = 3.516	0.0163	*					2mo vs. 18mo	ns	0.7041
	Row Factor	F (4, 35) = 2.329	0.0752	ns				AD-AD	2mo vs. 5mo	ns	0.918
	Column Factor	F (1, 35) = 15.52	0.0004	***					2mo vs. 7mo	ns	0.1645
Figure 1M (right: HPC vs. Ent)	Interaction	F (4, 35) = 10.07	<0.0001	***					2mo vs. 12mo	###	<0.0001
	Row Factor	F (4, 35) = 6.718	0.0004	***					2mo vs. 18mo	###	<0.0001
	Column Factor	F (1, 35) = 70.75	<0.0001	***			Figure 1I	WT-AD	2mo	ns	0.9495
Figure 1M (right: Ent vs. Cortex)	Interaction	F (4, 30) = 2.022	0.1166	ns					5mo	ns	0.8519
	Row Factor	F (4, 30) = 22.39	<0.0001	***					7mo	ns	0.2931
	Column Factor	F (1, 30) = 22.48	<0.0001	***					12mo	**	0.0032
									18mo	***	<0.0001
								WT-WT	2mo vs. 5mo	ns	0.9965
									2mo vs. 7mo	ns	0.9461
									2mo vs. 12mo	ns	0.8837
									2mo vs. 18mo	ns	0.9998
								AD-AD	2mo vs. 5mo	ns	>0.9999
									2mo vs. 7mo	ns	0.9944
									2mo vs. 12mo	ns	0.2376
									2mo vs. 18mo	###	0.0005
							Figure 1J	WT-AD	2mo	ns	0.9985
									5mo	ns	0.9888
									7mo	ns	0.5054
									12mo	ns	0.1124
									18mo	**	0.0018
								WT-WT	2mo vs. 5mo	ns	>0.9999
									2mo vs. 7mo	ns	0.9992
									2mo vs. 12mo	ns	>0.9999
									2mo vs. 18mo	ns	>0.9999
								AD-AD	2mo vs. 5mo	ns	0.999
									2mo vs. 7mo	ns	0.9237
									2mo vs. 12mo	ns	0.0705
									2mo vs. 18mo	##	0.001
							Figure 1K	WT-AD	2mo	ns	0.6256
									5mo	*	0.0119
									7mo	**	0.0052
									12mo	**	0.0052
									18mo	**	0.0014
								WT-WT	2mo vs. 5mo	#	0.018
									2mo vs. 7mo	#	0.0109
									2mo vs. 12mo	##	0.0049
									2mo vs. 18mo	##	0.0062
								AD-AD	2mo vs. 5mo	ns	0.6368
									2mo vs. 7mo	ns	0.7003
									2mo vs. 12mo	ns	0.5205
									2mo vs. 18mo	ns	0.8324
							Figure 1L	WT-AD	2mo	ns	0.8895
									5mo	ns	0.7859
									7mo	ns	0.2619
									12mo	*	0.0168
									18mo	**	0.0011
								WT-WT	2mo vs. 5mo	ns	>0.9999
									2mo vs. 7mo	ns	0.9624
									2mo vs. 12mo	ns	0.9924
									2mo vs. 18mo	ns	0.9982
								AD-AD	2mo vs. 5mo	ns	0.9998
									2mo vs. 7mo	ns	0.9961
									2mo vs. 12mo	ns	0.3837
									2mo vs. 18mo	##	0.0099

## Sheet: Fig.2
Summary of Statistical Analysis for Figure 2							Post-hoc Comparisons for Figure 2
Figure	Source of Variation	F (DFn, DFd)	P value	P value summary	Analysis Method		Figure		Time point	P value summary	P value	Analysis Method		In Figure 2, ***P<0.001, **P<0.01, *P<0.05, ns P>0.05 by two-way RM ANOVA with post hoc Bonferroni’s test.
Figure 2A	Interaction	F (4, 30) = 3.419	*	0.0203	Two-way RM ANOVA with post hoc Bonferroni’s test		Figure 2A	WT-AD	2mo	ns	0.9995	Two-way RM ANOVA with post hoc Bonferroni’s test
	Row Factor	F (4, 30) = 8.449	***	0.0001					5mo	ns	0.742
	Column Factor	F (1, 30) = 34.84	***	<0.0001					7mo	*	0.0278
Figure 2B	Interaction	F (4, 30) = 5.217	**	0.0026					12mo	***	0.001
	Row Factor	F (4, 30) = 11.55	***	<0.0001					18mo	***	0.0005
	Column Factor	F (1, 30) = 40.44	***	<0.0001			Figure 2B	WT-AD	2mo	ns	0.9981
Figure 2D (up)	Interaction	F (4, 50) = 2.105	ns	0.094					5mo	ns	0.5784
	Row Factor	F (4, 50) = 7.806	***	<0.0001					7mo	**	0.005
	Column Factor	F (1, 50) = 29.53	***	<0.0001					12mo	**	0.0012
Figure 2D (down)	Interaction	F (4, 50) = 3.005	*	0.0268					18mo	***	<0.0001
	Row Factor	F (4, 50) = 13.55	***	<0.0001			Figure 2D (up)	WT-AD	2mo	ns	0.9453
	Column Factor	F (1, 50) = 21.11	***	<0.0001					5mo	ns	0.8088
Figure 2F	Interaction	F (4, 30) = 0.4961	ns	0.7386					7mo	*	0.0472
	Row Factor	F (4, 30) = 0.3747	ns	0.8248					12mo	**	0.0038
	Column Factor	F (1, 30) = 174.4	***	<0.0001					18mo	**	0.001
Figure 2G	Interaction	F (4, 30) = 0.4108	ns	0.7994			Figure 2D (down)	WT-AD	2mo	ns	>0.9999
	Row Factor	F (4, 30) = 0.4268	ns	0.7881					5mo	ns	0.9214
	Column Factor	F (1, 30) = 1.541	ns	0.2241					7mo	ns	0.3862
Figure 2I	Interaction	F (4, 30) = 7.246	***	0.0003					12mo	**	0.003
	Row Factor	F (4, 30) = 63.27	***	<0.0001					18mo	**	0.001
	Column Factor	F (1, 30) = 117.8	***	<0.0001			Figure 2F	WT-AD	2mo	***	<0.0001
Figure 2J	Interaction	F (4, 30) = 0.4598	ns	0.7646					5mo	***	<0.0001
	Row Factor	F (4, 30) = 2.582	ns	0.0572					7mo	***	<0.0001
	Column Factor	F (1, 30) = 4.166	ns	0.0501					12mo	***	<0.0001
									18mo	***	<0.0001
							Figure 2G	WT-AD	2mo	ns	>0.9999
									5mo	ns	0.9518
									7mo	ns	>0.9999
									12mo	ns	0.786
									18mo	ns	0.7856
							Figure 2I	WT-AD	2mo	ns	0.8762
									5mo	*	0.017
									7mo	***	<0.0001
									12mo	***	<0.0001
									18mo	***	<0.0001
							Figure 2J	WT-AD	2mo	ns	0.9917
									5mo	ns	0.7687
									7mo	ns	0.9318
									12mo	ns	>0.9999
									18mo	ns	0.2825

## Sheet: Supp Fig.2
Summary of Statistical Analysis for Supplementary Fig.2							Post-hoc Comparisons for Supplementary Fig.2
Figure	Source of Variation	F (DFn, DFd)	P value	P value summary	Analysis Method		Figure		Time point	P value summary	P value	Analysis Method		In Supplementary Fig.2, ***P<0.001, **P<0.01, *P<0.05, ns P>0.05 by two-way RM ANOVA with post hoc Bonferroni’s test.
Figure S2B (layerI)	Interaction	F (4, 30) = 0.4113	0.7991	ns	Two-way RM ANOVA with post hoc Bonferroni’s test		Figure S2B (layerI)	WT-AD	2mo	ns	0.9643	Two-way RM ANOVA with post hoc Bonferroni’s test
	Row Factor	F (4, 30) = 0.1240	0.9727	ns					5mo	ns	>0.9999
	Column Factor	F (1, 30) = 3.760	0.0619	ns					7mo	ns	0.566
Figure S2B (layerII)	Interaction	F (4, 30) = 4.270	0.0075	**					12mo	ns	0.9887
	Row Factor	F (4, 30) = 7.922	0.0002	***					18mo	ns	0.4914
	Column Factor	F (1, 30) = 27.02	<0.0001	***			Figure S2B (layerII)	WT-AD	2mo	ns	0.9643
Figure S2B (layerIII)	Interaction	F (4, 30) = 2.160	0.0978	ns					5mo	ns	0.7693
	Row Factor	F (4, 30) = 5.215	0.0026	**					7mo	*	0.0237
	Column Factor	F (1, 30) = 21.22	<0.0001	***					12mo	**	0.002
Figure S2B (layerV/VI)	Interaction	F (4, 30) = 1.802	0.1544	ns					18mo	**	0.0013
	Row Factor	F (4, 30) = 4.789	0.0042	**			Figure S2B (layerIII)	WT-AD	2mo	ns	0.9945
	Column Factor	F (1, 30) = 23.55	<0.0001	***					5mo	ns	0.9402
									7mo	ns	0.2761
									12mo	**	0.0084
									18mo	**	0.0048
							Figure S2B (layerV/VI)	WT-AD	2mo	ns	0.9374
									5mo	ns	0.7987
									7mo	ns	0.3285
									12mo	*	0.0185
									18mo	**	0.0022

## Sheet: Supp Fig.3
Summary of Statistical Analysis for Supplementary Fig.3							Post-hoc Comparisons for Supplementary Fig.3
Figure	Source of Variation	F (DFn, DFd)	P value	P value summary	Analysis Method		Figure		Time point	P value summary	P value	Analysis Method		In Supplementary Fig.3, ***P<0.001, **P<0.01, *P<0.05, NS P>0.05 by two-way RM ANOVA with post hoc Bonferroni’s test.
Figure S3B (layerI)	Interaction	F (4, 30) = 0.2552	0.9042	ns	Two-way RM ANOVA with post hoc Bonferroni’s test		Figure S3B (layerI)	WT-AD	2mo	***	0.0006	Two-way RM ANOVA with post hoc Bonferroni’s test
	Row Factor	F (4, 30) = 0.3953	0.8104	ns					5mo	***	0.0005
	Column Factor	F (1, 30) = 108.9	<0.0001	***					7mo	***	0.0005
Figure S3B (layerII)	Interaction	F (4, 30) = 0.4603	0.7642	ns					12mo	***	0.0007
	Row Factor	F (4, 30) = 0.3685	0.8291	ns					18mo	***	<0.0001
	Column Factor	F (1, 30) = 94.74	<0.0001	***			Figure S3B (layerII)	WT-AD	2mo	**	0.003
Figure S3B (layerIII)	Interaction	F (4, 30) = 0.3151	0.8656	ns					5mo	**	0.0028
	Row Factor	F (4, 30) = 0.3823	0.8195	ns					7mo	**	0.0023
	Column Factor	F (1, 30) = 83.67	<0.0001	***					12mo	***	0.0002
Figure S3B (layerV/VI)	Interaction	F (4, 30) = 0.2063	0.9329	ns					18mo	***	<0.0001
	Row Factor	F (4, 30) = 0.4591	0.765	ns			Figure S3B (layerIII)	WT-AD	2mo	**	0.0078
	Column Factor	F (1, 30) = 86.33	<0.0001	***					5mo	***	0.0009
									7mo	**	0.0039
									12mo	**	0.0018
									18mo	***	0.0001
							Figure S3B (layerV/VI)	WT-AD	2mo	***	0.0002
									5mo	**	0.0014
									7mo	**	0.007
									12mo	**	0.0016
									18mo	***	0.0008

## Sheet: Fig.3
Summary of Statistical Analysis for Figure 3								Post-hoc Comparisons for Figure 3
Figure	Source of Variation	F (DFn, DFd)	P value	P value summary	Analysis Method			Figure		Time point	P value summary	P value	Analysis Method		In Figure 3, ***P<0.001, **P<0.01, *P<0.05, ##P<0.01, #P<0.05, ns P>0.05 by two-way RM ANOVA with post hoc Bonferroni’s test.
Figure 3B	Interaction	F (4, 30) = 12.65	<0.0001	***	Two-way RM ANOVA with post hoc Bonferroni’s test			Figure 3B	WT-AD	2mo	***	<0.0001	Two-way RM ANOVA with post hoc Bonferroni’s test
	Row Factor	F (4, 30) = 122.3	<0.0001	***						5mo	***	<0.0001
	Column Factor	F (1, 30) = 259.7	<0.0001	***						7mo	***	<0.0001
Figure 3D	Interaction	F (4, 30) = 1.359	0.2715	ns						12mo	**	0.0025
	Row Factor	F (4, 30) = 1.166	0.3455	ns						18mo	**	0.0079
	Column Factor	F (1, 30) = 15.21	0.0005	***				Figure 3D	WT-AD	2mo	ns	0.4494
Figure 3F	Interaction	F (4, 30) = 0.002859	>0.9999	ns						5mo	ns	>0.9999
	Row Factor	F (4, 30) = 31.01	<0.0001	***						7mo	ns	0.2895
	Column Factor	F (1, 30) = 31.46	<0.0001	***						12mo	ns	0.2895
Figure 3G	Interaction	F (4, 30) = 0.5416	0.7064	ns						18mo	*	0.0134
	Row Factor	F (4, 30) = 3.223	0.0258	*				Figure 3F	WT-AD	2mo	ns	0.0873
	Column Factor	F (1, 30) = 0.5698	0.4562	ns						5mo	ns	0.0835
Figure 3I	Interaction	F (4, 30) = 5.520	0.0019	**						7mo	ns	0.0796
	Row Factor	F (4, 30) = 64.95	<0.0001	***						12mo	ns	0.0765
	Column Factor	F (1, 30) = 69.83	<0.0001	***						18mo	ns	0.104
Figure 3J	Interaction	F (4, 30) = 1.803	0.1543	ns					WT-WT	12mo vs. 18mo	##	0.0016
	Row Factor	F (4, 30) = 1.658	0.1858	ns					AD-AD	12mo vs. 18mo	##	0.0011
	Column Factor	F (1, 30) = 2.368	0.1343	ns				Figure 3G	WT-AD	2mo	ns	0.9874
										5mo	ns	0.628
										7mo	ns	>0.9999
										12mo	ns	0.9736
										18mo	ns	0.9992
								Figure 3I	WT-AD	2mo	ns	0.8801
										5mo	ns	0.1827
										7mo	##	0.0038
										12mo	###	<0.0001
										18mo	###	0.0002
								Figure 3J	WT-AD	2mo	ns	0.968
										5mo	ns	0.9985
										7mo	ns	0.9996
										12mo	ns	0.2489
										18mo	ns	0.1576

## Sheet: Supp Fig.4
Summary of Statistical Analysis for Supplementary Fig.4							Post-hoc Comparisons for Supplementary Fig.4
Figure	Source of Variation	F (DFn, DFd)	P value	P value summary	Analysis Method		Figure		Time point	P value summary	P value	Analysis Method		In Supplementary Fig.4, ***P<0.001, **P<0.01, *P<0.05, ##P<0.01, #P<0.05, ns P>0.05 by two-way RM ANOVA with post hoc Bonferroni’s test.
Figure S4B (CA1)	Interaction	F (4, 30) = 2.188	0.0944	ns	Two-way RM ANOVA with post hoc Bonferroni’s test		Figure S4B (CA1)	WT-AD	2mo	ns	0.3896	Two-way RM ANOVA with post hoc Bonferroni’s test
	Row Factor	F (4, 30) = 0.5055	0.7319	ns					5mo	ns	0.9661
	Column Factor	F (1, 30) = 12.78	0.0012	**					7mo	ns	0.6011
Figure S4B (CA3)	Interaction	F (4, 30) = 0.9436	0.4524	ns					12mo	ns	0.1682
	Row Factor	F (4, 30) = 3.808	0.0128	*					18mo	*	0.0108
	Column Factor	F (1, 30) = 10.22	0.0033	**			Figure S4B (CA3)	WT-AD	2mo	ns	0.9085
Figure S4D (CA1)	Interaction	F (4, 30) = 0.5516	0.6993	ns					5mo	ns	0.9979
	Row Factor	F (4, 30) = 1.902	0.136	ns					7mo	ns	0.6546
	Column Factor	F (1, 30) = 1.198	0.2824	ns					12mo	ns	0.4852
Figure S4D (CA3)	Interaction	F (4, 30) = 0.4526	0.7697	ns					18mo	*	0.0293
	Row Factor	F (4, 30) = 0.5675	0.6881	ns			Figure S4D (CA1)	WT-AD	2mo	ns	0.9126
	Column Factor	F (1, 30) = 1.381	0.2491	ns					5mo	ns	0.4748
Figure S4D (DG)	Interaction	F (4, 24) = 0.1055	0.9795	ns					7mo	ns	>0.9999
	Row Factor	F (2.634, 15.80) = 2.531	0.0999	ns					12mo	ns	0.9998
	Column Factor	F (1, 6) = 0.2750	0.6188	ns					18mo	ns	>0.9999
Figure S4E (CA1)	Interaction	F (4, 30) = 0.2731	0.893	ns			Figure S4D (CA3)	WT-AD	2mo	ns	0.8866
	Row Factor	F (4, 30) = 21.49	<0.0001	***					5mo	ns	0.6841
	Column Factor	F (1, 30) = 22.17	<0.0001	***					7mo	ns	0.9902
Figure S4E (CA3)	Interaction	F (4, 30) = 0.2034	0.9345	ns					12mo	ns	0.9934
	Row Factor	F (4, 30) = 20.11	<0.0001	***					18mo	ns	0.9986
	Column Factor	F (1, 30) = 20.06	0.0001	***			Figure S4D (DG)	WT-AD	2mo	ns	0.9884
Figure S4E (DG)	Interaction	F (4, 30) = 2.160	0.0978	ns					5mo	ns	>0.9999
	Row Factor	F (4, 30) = 14.17	<0.0001	***					7mo	ns	0.9979
	Column Factor	F (1, 30) = 17.47	0.0002	***					12mo	ns	0.992
									18mo	ns	>0.9999
							Figure S4E (CA1)	WT-AD	2mo	ns	0.1685
									5mo	ns	0.0944
									7mo	ns	0.0551
									12mo	ns	0.3714
									18mo	ns	0.6023
								WT-WT	12mo vs. 18mo	##	0.0098
								AD-AD	12mo vs. 18mo	##	0.004
							Figure S4E (CA3)	WT-AD	2mo	ns	0.0636
									5mo	ns	0.5715
									7mo	ns	0.1928
									12mo	ns	0.4029
									18mo	ns	0.208
								WT-WT	12mo vs. 18mo	##	0.0043
								AD-AD	12mo vs. 18mo	#	0.0115
							Figure S4E (DG)	WT-AD	2mo	ns	0.9624
									5mo	ns	0.8562
									7mo	ns	0.9659
									12mo	*	0.0146
									18mo	**	0.0044
								WT-WT	12mo vs. 18mo	#	0.013
								AD-AD	12mo vs. 18mo	#	0.0387

## Sheet: Fig.4
Summary of Statistical Analysis for Figure 4								Post-hoc Comparisons for Figure 4
Figure	Brain region	Source of Variation	F (DFn, DFd)	P value	P value summary	Analysis Method		Figure		Gene	P value summary	P value	Analysis Method		In Figure.4, ***P<0.001, **P<0.01, *P<0.05, ns P>0.05 by two-way RM ANOVA with post hoc Bonferroni’s test.
Figure 4A (Ent)	7mo (left)	Interaction	F (5, 60) = 0.11	0.991	ns	Two-way RM ANOVA with post hoc Bonferroni’s test		Figure 4A (Ent)	7mo (left)	CCK	*	0.0421	Two-way RM ANOVA with post hoc Bonferroni’s test
		Row Factor	F (5, 60) = 3.45	0.008	**					CCK-BR	ns	0.1952
		Column Factor	F (1, 60) = 25.83	<0.001	***					BDNF	ns	0.8499
	12mo (middle)	Interaction	F (5, 60) = 0.08	0.995	ns					GAD1	ns	0.9861
		Row Factor	F (5, 60) = 5.78	<0.001	***					SLC1A2	ns	0.7316
		Column Factor	F (1, 60) = 67.89	<0.001	***					SYN1	ns	0.4147
	18mo (right)	Interaction	F (5, 60) = 0.09	0.992	ns				12mo (middle)	CCK	**	0.0023
		Row Factor	F (5, 60) = 8.76	<0.001	***					CCK-BR	**	0.0089
		Column Factor	F (1, 60) = 92.13	<0.001	***					BDNF	*	0.048
Figure 4B (AC)	7mo (left)	Interaction	F (5, 60) = 0.28	0.923	ns					GAD1	ns	0.0797
		Row Factor	F (5, 60) = 2.88	0.021	*					SLC1A2	ns	0.0988
		Column Factor	F (1, 60) = 4.12	0.047	*					SYN1	ns	0.0577
	12mo (middle)	Interaction	F (5, 60) = 0.51	0.768	ns				18mo (right)	CCK	***	0.0006
		Row Factor	F (5, 60) = 4.12	0.003	**					CCK-BR	**	0.0038
		Column Factor	F (1, 60) = 45.23	<0.001	***					BDNF	*	0.0336
	18mo (right)	Interaction	F (5, 60) = 0.12	0.988	ns					GAD1	*	0.0278
		Row Factor	F (5, 60) = 7.89	<0.001	***					SLC1A2	*	0.0494
		Column Factor	F (1, 60) = 78.45	<0.001	***					SYN1	ns	0.0534
Figure 4C (VC)	7mo (left)	Interaction	F (5, 60) = 0.03	0.999	ns			Figure 4B (AC)	7mo (left)	CCK	ns	0.6897
		Row Factor	F (5, 60) = 4.89	<0.001	***					CCK-BR	ns	0.9389
		Column Factor	F (1, 60) = 22.94	<0.001	***					BDNF	ns	0.9779
	12mo (middle)	Interaction	F (5, 60) = 0.02	>0.9999	ns					GAD1	ns	0.945
		Row Factor	F (5, 60) = 6.45	<0.001	***					SLC1A2	ns	0.6564
		Column Factor	F (1, 60) = 52.34	<0.001	***					SYN1	ns	0.9225
	18mo (right)	Interaction	F (5, 60) = 0.05	0.998	ns				12mo (middle)	CCK	*	0.0299
		Row Factor	F (5, 60) = 9.34	<0.001	***					CCK-BR	*	0.0433
		Column Factor	F (1, 60) = 85.67	<0.001	***					BDNF	ns	0.6869
Figure 4D (HPC)	7mo (left)	Interaction	F (5, 60) = 0.02	>0.9999	ns					GAD1	ns	0.379
		Row Factor	F (5, 60) = 3.21	0.013	*					SLC1A2	ns	0.4941
		Column Factor	F (1, 60) = 38.12	<0.001	***					SYN1	ns	0.1572
	12mo (middle)	Interaction	F (5, 60) = 0.01	>0.9999	ns				18mo (right)	CCK	**	0.001
		Row Factor	F (5, 60) = 4.89	<0.001	***					CCK-BR	**	0.0065
		Column Factor	F (1, 60) = 58.91	<0.001	***					BDNF	ns	0.0932
	18mo (right)	Interaction	F (5, 60) = 0.03	0.999	ns					GAD1	*	0.0455
		Row Factor	F (5, 60) = 8.12	<0.001	***					SLC1A2	*	0.0338
		Column Factor	F (1, 60) = 96.78	<0.001	***					SYN1	*	0.0221
Figure 4E (PFC)	7mo (left)	Interaction	F (5, 60) = 0.04	0.999	ns			Figure 4C (VC)	7mo (left)	CCK	ns	0.4679
		Row Factor	F (5, 60) = 2.67	0.03	*					CCK-BR	ns	0.7186
		Column Factor	F (1, 60) = 26.45	<0.001	***					BDNF	ns	0.9593
	12mo (middle)	Interaction	F (5, 60) = 0.03	0.999	ns					GAD1	ns	0.7137
		Row Factor	F (5, 60) = 5.23	<0.001	***					SLC1A2	ns	0.9033
		Column Factor	F (1, 60) = 49.67	<0.001	***					SYN1	ns	0.9683
	18mo (right)	Interaction	F (5, 60) = 0.07	0.995	ns				12mo (middle)	CCK	**	0.0027
		Row Factor	F (5, 60) = 7.45	<0.001	***					CCK-BR	*	0.0248
		Column Factor	F (1, 60) = 88.91	<0.001	***					BDNF	ns	0.1475
Figure 4F (MC)	7mo (left)	Interaction	F (5, 60) = 0.05	0.998	ns					GAD1	*	0.0271
		Row Factor	F (5, 60) = 3.89	0.004	**					SLC1A2	*	0.0363
		Column Factor	F (1, 60) = 18.76	<0.001	***					SYN1	ns	0.1008
	12mo (middle)	Interaction	F (5, 60) = 0.04	0.999	ns				18mo (right)	CCK	*	0.0194
		Row Factor	F (5, 60) = 4.56	0.001	**					CCK-BR	**	0.0049
		Column Factor	F (1, 60) = 41.82	<0.001	***					BDNF	ns	0.0784
	18mo (right)	Interaction	F (5, 60) = 0.06	0.997	ns					GAD1	*	0.0268
		Row Factor	F (5, 60) = 8.89	<0.001	***					SLC1A2	ns	0.3496
		Column Factor	F (1, 60) = 81.23	<0.001	***					SYN1	*	0.049
								Figure 4D (HPC)	7mo (left)	CCK	ns	0.1992
										CCK-BR	ns	0.4077
										BDNF	ns	0.6718
										GAD1	ns	0.9401
										SLC1A2	ns	0.9947
										SYN1	ns	0.2944
									12mo (middle)	CCK	*	0.0323
										CCK-BR	*	0.0172
										BDNF	ns	0.4084
										GAD1	ns	0.0938
										SLC1A2	ns	0.2291
										SYN1	*	0.0351
									18mo (right)	CCK	**	0.0018
										CCK-BR	**	0.0079
										BDNF	*	0.0128
										GAD1	**	0.0061
										SLC1A2	*	0.0126
										SYN1	ns	0.0953
								Figure 4E (PFC)	7mo (left)	CCK	ns	0.9399
										CCK-BR	ns	0.6017
										BDNF	ns	0.9501
										GAD1	ns	0.968
										SLC1A2	ns	0.6403
										SYN1	ns	0.7995
									12mo (middle)	CCK	*	0.0234
										CCK-BR	*	0.0464
										BDNF	ns	0.8035
										GAD1	ns	0.1509
										SLC1A2	ns	0.3871
										SYN1	ns	0.2809
									18mo (right)	CCK	*	0.0102
										CCK-BR	*	0.0195
										BDNF	ns	0.0624
										GAD1	*	0.0323
										SLC1A2	ns	0.1344
										SYN1	*	0.0103
								Figure 4F (MC)	7mo (left)	CCK	ns	0.9082
										CCK-BR	ns	0.9865
										BDNF	ns	0.6147
										GAD1	ns	0.4981
										SLC1A2	ns	>0.9999
										SYN1	ns	0.5026
									12mo (middle)	CCK	*	0.0188
										CCK-BR	ns	0.0974
										BDNF	*	0.0442
										GAD1	ns	0.3623
										SLC1A2	ns	0.0697
										SYN1	ns	0.2345
									18mo (right)	CCK	*	0.0114
										CCK-BR	*	0.0381
										BDNF	ns	0.0985
										GAD1	*	0.0249
										SLC1A2	ns	0.2223
										SYN1	*	0.0448

## Sheet: Supp Fig.5
Summary of Statistical Analysis for Supp Fig.5
Figure	Gene	Time point	WT Mean ± SD	AD Mean ± SD	U value	P value	P value summary	Analysis Method		For the qRT-PCR analysis in Supp Fig.5, data are presented as fold change relative to the mean of the 2-month-old WT control group (set to 1.0). Each data point represents one mouse (n=3 mice per group); the value for each mouse was calculated from the mean of three technical replicates. Due to the small sample size, group comparisons were made using the Mann-Whitney U test. n.s., not significant…
Figure S5A (left)	CCK	2mo	1.005 ± 0.0830	1 ± 0.0668	4	> 0.05	ns	Mann-Whitney U test (Post-hoc comparisons )
		5mo	0.9753 ± 0.0627	0.8947 ± 0.0836	1	> 0.05	ns
Figure S5A (right)	CCK-BR	2mo	1.000 ± 0.0649	1.004 ± 0.0756	0	> 0.05	ns
		5mo	0.9933 ± 0.0598	0.92 ± 0.0591	2	> 0.05	ns

## Sheet: Fig.5
Summary of Statistical Analysis for Figure 5							Post-hoc Comparisons for Figure 5
Figure	Source of Variation	F (DFn, DFd)	P value	P value summary	Analysis Method		Figure		Time point	P value summary	P value	Analysis Method		In Figure 5, ***P<0.001, **P<0.01, *P<0.05, ns P>0.05 by two-way RM ANOVA with post hoc Bonferroni’s test. In the rotarod test of Figure 5 (Fig. 5F,I), the Greenhouse-Geisser correction was used for the main effect of time following a significant violation of sphericity (Mauchly’s test).
Figure 5B (left)	Interaction	F (4, 90) = 0.1458	0.9644	ns	Two-way RM ANOVA with post hoc Bonferroni’s test		Figure 5B (left)	WT-AD	2mo	ns	0.9969	Two-way RM ANOVA with post hoc Bonferroni’s test
	Row Factor	F (4, 90) = 0.7336	0.5714	ns					5mo	ns	0.9862
	Column Factor	F (1, 90) = 1.433	0.2345	ns					7mo	ns	>0.9999
Figure 5B (right)	Interaction	F (4, 90) = 2.800	0.0305	*					12mo	ns	0.9959
	Row Factor	F (4, 90) = 8.275	<0.0001	***					18mo	ns	0.7647
	Column Factor	F (1, 90) = 31.57	<0.0001	***			Figure 5B (right)	WT-AD	2mo	ns	>0.9999
Figure 5D (left)	Interaction	F (2, 54) = 0.04970	0.9516	ns					5mo	ns	0.3587
	Row Factor	F (2, 54) = 0.1958	0.8228	ns					7mo	*	0.0334
	Column Factor	F (1, 54) = 0.7827	0.3802	ns					12mo	**	0.0016
Figure 5D (right)	Interaction	F (2, 54) = 0.003169	0.9968	ns					18mo	***	0.0003
	Row Factor	F (2, 54) = 23.19	<0.0001	***			Figure 5D (left)	CCK4-VEH	7mo	ns	0.8297
	Column Factor	F (1, 54) = 32.30	<0.0001	***					12mo	ns	0.974
Figure 5F (2mo)	Genotype x Time	F (4, 104) = 0.1621	0.957	ns					18mo	ns	0.974
	Time	F (2.581, 67.10) = 27.04	<0.0001	***			Figure 5D (right)	CCK4-VEH	7mo	**	0.0052
	Genotype	F (1, 26) = 0.3022	0.5872	ns					12mo	**	0.0065
Figure 5F (5mo)	Genotype x Time	F (4, 104) = 0.6455	0.6313	ns					18mo	**	0.0047
	Time	F (2.075, 53.95) = 18.33	<0.0001	***			Figure 5F (2mo)	WT-AD	Day 1	ns	0.9998
	Genotype	F (1, 26) = 1.691	0.2049	ns					Day 2	ns	>0.9999
Figure 5F (7mo)	Genotype x Time	F (4, 104) = 2.329	0.0609	ns					Day 3	ns	>0.9999
	Time	F (2.684, 69.79) = 24.97	<0.0001	***					Day 4	ns	0.573
	Genotype	F (1, 26) = 2.042	0.1649	ns					Day 5	ns	0.8167
Figure 5F (12mo)	Genotype x Time	F (4, 104) = 1.826	<0.0001	***			Figure 5F (5mo)	WT-AD	Day 1	ns	0.5591
	Time	F (2.840, 73.85) = 22.55	<0.0001	***					Day 2	ns	0.9481
	Genotype	F (1, 26) = 21.76	<0.0001	***					Day 3	ns	0.8025
Figure 5F (18mo)	Genotype x Time	F (4, 104) = 7.565	<0.0001	***					Day 4	ns	0.9938
	Time	F (2.397, 62.33) = 36.06	<0.0001	***					Day 5	ns	0.6461
	Genotype	F (1, 26) = 97.14	<0.0001	***			Figure 5F (7mo)	WT-AD	Day 1	ns	0.9902
Figure 5G	Interaction	F (4, 130) = 39.70	<0.0001	***					Day 2	ns	>0.9999
	Row Factor	F (4, 130) = 53.38	<0.0001	***					Day 3	ns	0.3028
	Column Factor	F (1, 130) = 127.1	<0.0001	***					Day 4	*	0.042
Figure 5I (12mo)	Treatment x Time	F (4, 104) = 5.855	0.0003	***					Day 5	ns	0.095
	Time	F (1.980, 51.47) = 52.55	<0.0001	***			Figure 5F (12mo)	WT-AD	Day 1	ns	0.0579
	Treatment	F (1, 26) = 7.254	0.0122	*					Day 2	ns	0.0887
Figure 5I (18mo)	Treatment x Time	F (4, 104) = 4.343	0.0027	**					Day 3	***	0.0007
	Time	F (2.488, 64.70) = 31.51	<0.0001	***					Day 4	***	0.0001
	Treatment	F (1, 26) = 6.032	0.021	*					Day 5	***	0.0008
							Figure 5F (18mo)	WT-AD	Day 1	***	<0.0001
									Day 2	***	<0.0001
									Day 3	***	<0.0001
									Day 4	***	<0.0001
									Day 5	***	<0.0001
							Figure 5G	WT-AD	2mo	ns	0.982
									5mo	ns	0.8717
									7mo	ns	0.236
									12mo	***	<0.0001
									18mo	***	<0.0001
							Figure 5I (12mo)	CCK4-VEH	Day 1	ns	0.6851
									Day 2	ns	0.7152
									Day 3	ns	0.087
									Day 4	*	0.0157
									Day 5	**	0.0014
							Figure 5I (18mo)	CCK4-VEH	Day 1	ns	0.8303
									Day 2	ns	0.2945
									Day 3	ns	0.4036
									Day 4	*	0.0116
									Day 5	*	0.0172

## Sheet: Supp Fig.6
Summary of Statistical Analysis for Supp Fig.6							Post-hoc Comparisons for Supp Fig.6
Figure	Source of Variation	F (DFn, DFd)	P value	P value summary	Analysis Method		Figure		Time point	P value summary	P value	Analysis Method		In Supp Fig.6, ***P<0.001, **P<0.01, *P<0.05, ns P>0.05 by two-way RM ANOVA with post hoc Bonferroni’s test. For the results of rotarod test, the Greenhouse-Geisser correction was used for the main effect of time following a significant violation of sphericity (Mauchly’s test).
Figure S6A (left: WT-WT)	Interaction	F (4, 40) = 0.1715	0.9517	ns	Two-way RM ANOVA with post hoc Bonferroni’s test		Figure S6A (left: WT)	M-F	2mo	0.9703	ns	Two-way RM ANOVA with post hoc Bonferroni’s test
	Row Factor	F (4, 40) = 0.6022	0.6632	ns					5mo	0.9993	ns
	Column Factor	F (1, 40) = 0.05268	0.8196	ns					7mo	0.9998	ns
Figure S6A (left: AD-AD)	Interaction	F (4, 40) = 0.4368	0.7812	ns					12mo	>0.9999	ns
	Row Factor	F (4, 40) = 0.2282	0.921	ns					18mo	0.9952	ns
	Column Factor	F (1, 40) = 1.281	0.2644	ns			Figure S6A (left: AD)	M-F	2mo	0.9958	ns
Figure S6A (right: WT-WT)	Interaction	F (4, 40) = 0.4035	0.805	ns					5mo	0.9498	ns
	Row Factor	F (4, 40) = 0.7864	0.5408	ns					7mo	0.9999	ns
	Column Factor	F (1, 40) = 5.044	0.0303	*					12mo	0.5691	ns
Figure S6A (right: AD-AD)	Interaction	F (4, 40) = 0.2487	0.9088	ns					18mo	>0.9999	ns
	Row Factor	F (4, 40) = 9.337	<0.0001	***			Figure S6A (right: WT)	M-F	2mo	0.9908	ns
	Column Factor	F (1, 40) = 7.804	0.008	**					5mo	>0.9999	ns
Figure S6B (left)	Interaction	F (4, 90) = 1.627	0.1743	ns					7mo	0.5457	ns
	Row Factor	F (4, 90) = 7.859	<0.0001	***					12mo	0.772	ns
	Column Factor	F (1, 90) = 38.57	<0.0001	***					18mo	0.6591	ns
Figure S6B (right: WT-WT)	Interaction	F (4, 40) = 0.2348	0.9171	ns			Figure S6A (right: AD)	M-F	2mo	0.5165	ns
	Row Factor	F (4, 40) = 1.284	0.2926	ns					5mo	0.8268	ns
	Column Factor	F (1, 40) = 2.690	0.1088	ns					7mo	0.7587	ns
Figure S6B (right: AD-AD)	Interaction	F (4, 40) = 0.1827	0.9461	ns					12mo	0.9597	ns
	Row Factor	F (4, 40) = 8.507	<0.0001	***					18mo	0.8698	ns
	Column Factor	F (1, 40) = 2.435	0.1266	ns			Figure S6B (left)	WT-AD	2mo	0.9079	ns
Figure S6C (left)	Interaction	F (4, 90) = 1.283	0.2825	ns					5mo	0.1899	ns
	Row Factor	F (4, 90) = 4.268	0.0033	**					7mo	0.0064	**
	Column Factor	F (1, 90) = 19.02	<0.0001	***					12mo	0.0016	**
Figure S6C (right: WT-WT)	Interaction	F (4, 40) = 0.1283	0.9713	ns					18mo	0.001	**
	Row Factor	F (4, 40) = 0.6698	0.6167	ns			Figure S6B (right: WT)	M-F	2mo	0.9305	ns
	Column Factor	F (1, 40) = 6.136	0.0176	*					5mo	0.848	ns
Figure S6C (right: AD-AD)	Interaction	F (4, 40) = 0.1713	0.9518	ns					7mo	0.9955	ns
	Row Factor	F (4, 40) = 7.676	0.0001	***					12mo	0.9239	ns
	Column Factor	F (1, 40) = 11.74	0.0014	**					18mo	0.9832	ns
Figure S6D (left: VEH)	Interaction	F (2, 24) = 0.5913	0.5615	ns			Figure S6B (right: AD)	M-F	2mo	0.9828	ns
	Row Factor	F (2, 24) = 0.1573	0.8554	ns					5mo	0.7756	ns
	Column Factor	F (1, 24) = 0.05504	0.8165	ns					7mo	0.9865	ns
Figure S6D (left: CCK-4)	Interaction	F (2, 24) = 0.3138	0.7336	ns					12mo	0.97	ns
	Row Factor	F (2, 24) = 0.06202	0.94	ns					18mo	0.7856	ns
	Column Factor	F (1, 24) = 0.7017	0.4105	ns			Figure S6C (left)	WT-AD	2mo	0.9914	ns
Figure S6D (right: VEH)	Interaction	F (2, 24) = 0.1543	0.8578	ns					5mo	0.5558	ns
	Row Factor	F (2, 24) = 14.25	<0.0001	***					7mo	0.4608	ns
	Column Factor	F (1, 24) = 3.739	0.065	ns					12mo	0.016	*
Figure S6D (right: CCK-4)	Interaction	F (2, 24) = 0.3033	0.7412	ns					18mo	0.0101	*
	Row Factor	F (2, 24) = 9.768	0.0008	***			Figure S6C (right: WT)	M-F	2mo	0.9217	ns
	Column Factor	F (1, 24) = 1.660	0.2099	ns					5mo	0.5685	ns
Figure S6E (left)	Interaction	F (2, 54) = 0.2838	0.754	ns					7mo	0.8867	ns
	Row Factor	F (2, 54) = 27.50	<0.0001	***					12mo	0.9402	ns
	Column Factor	F (1, 54) = 1.093	0.3005	ns					18mo	0.7557	ns
Figure S6E (right: VEH)	Interaction	F (2, 24) = 1.084	0.3544	ns			Figure S6C (right: AD)	M-F	2mo	0.7073	ns
	Row Factor	F (2, 24) = 15.82	<0.0001	***					5mo	0.3018	ns
	Column Factor	F (1, 24) = 0.9512	0.3391	ns					7mo	0.8683	ns
Figure S6E (right: CCK-4)	Interaction	F (2, 24) = 1.229	0.3104	ns					12mo	0.997	ns
	Row Factor	F (2, 24) = 12.26	0.0002	***					18mo	0.9693	ns
	Column Factor	F (1, 24) = 0.01225	0.9128	ns			Figure S6D (left: VEH)	M-F	7mo	>0.9999	ns
Figure S6F (left)	Interaction	F (2, 54) = 0.03360	0.967	ns					12mo	0.9128	ns
	Row Factor	F (2, 54) = 19.75	<0.0001	***					18mo	0.8162	ns
	Column Factor	F (1, 54) = 8.109	0.0062	**			Figure S6D (left: CCK-4)	M-F	7mo	0.8099	ns
Figure S6F (right: VEH)	Interaction	F (2, 24) = 0.2020	0.8185	ns					12mo	0.8639	ns
	Row Factor	F (2, 24) = 9.286	0.001	**					18mo	0.9979	ns
	Column Factor	F (1, 24) = 5.572	0.0267	*			Figure S6D (right: VEH)	M-F	7mo	0.488	ns
Figure S6F (right: CCK-4)	Interaction	F (2, 24) = 0.6442	0.5339	ns					12mo	0.5165	ns
	Row Factor	F (2, 24) = 12.82	0.0002	***					18mo	0.9032	ns
	Column Factor	F (1, 24) = 2.186	0.1522	ns			Figure S6D (right: CCK-4)	M-F	7mo	0.8967	ns
Figure S6G (2mo-WT)	Sex x Time	F (4, 48) = 0.4995	0.7362	ns					12mo	0.8582	ns
	Time	F (2.236, 26.83) = 12.98	<0.0001	***					18mo	0.5503	ns
	Sex	F (1, 12) = 0.5952	0.4553	ns			Figure S6E (left)	CCK4-VEH	7mo	0.7651	ns
Figure S6G (2mo-AD)	Sex x Time	F (4, 48) = 1.714	0.1624	ns					12mo	>0.9999	ns
	Time	F (2.578, 30.93) = 14.48	<0.0001	***					18mo	0.7491	ns
	Sex	F (1, 12) = 4.744	0.0501	ns			Figure S6E (right: VEH)	M-F	7mo	0.9601	ns
Figure S6G (5mo-WT)	Sex x Time	F (4, 48) = 0.4253	0.7896	ns					12mo	0.3849	ns
	Time	F (1.966, 23.59) = 8.849	0.0014	**					18mo	0.7513	ns
	Sex	F (1, 12) = 0.01352	0.9094	ns			Figure S6E (right: CCK-4)	M-F	7mo	0.74	ns
Figure S6G (5mo-AD)	Sex x Time	F (4, 48) = 0.1234	0.9734	ns					12mo	0.9944	ns
	Time	F (1.743, 20.91) = 8.961	0.0022	**					18mo	0.5179	ns
	Sex	F (1, 12) = 0.2516	0.625	ns			Figure S6F (left)	CCK4-VEH	7mo	0.3203	ns
Figure S6G (7mo-WT)	Sex x Time	F (4, 48) = 1.113	0.3614	ns					12mo	0.5303	ns
	Time	F (1.906, 22.87) = 22.53	<0.0001	***					18mo	0.0937	ns
	Sex	F (1, 12) = 1.136	0.3074	ns			Figure S6F (right: VEH)	M-F	7mo	0.7614	ns
Figure S6G (7mo-AD)	Sex x Time	F (4, 48) = 0.6472	0.6316	ns					12mo	0.4931	ns
	Time	F (2.964, 35.57) = 6.218	0.0017	**					18mo	0.2537	ns
	Sex	F (1, 12) = 0.8204	0.3829	ns			Figure S6F (right: CCK-4)	M-F	7mo	0.9842	ns
Figure S6G (12mo-WT)	Sex x Time	F (4, 48) = 0.3830	0.8197	ns					12mo	0.3952	ns
	Time	F (2.521, 30.25) = 15.97	<0.0001	***					18mo	0.945	ns
	Sex	F (1, 12) = 0.2686	0.6137	ns			Figure S6G (2mo-WT)	M-F	Day 1	0.9339	ns
Figure S6G (12mo-AD)	Sex x Time	F (4, 48) = 0.6746	0.6129	ns					Day 2	0.9977	ns
	Time	F (2.374, 28.49) = 7.353	0.0017	**					Day 3	0.9651	ns
	Sex	F (1, 12) = 1.091	0.3169	ns					Day 4	0.8919	ns
Figure S6G (18mo-WT)	Sex x Time	F (4, 48) = 0.06269	0.9925	ns					Day 5	0.4721	ns
	Time	F (2.386, 28.63) = 45.72	<0.0001	***			Figure S6G (2mo-AD)	M-F	Day 1	0.7235	ns
	Sex	F (1, 12) = 0.2627	0.6176	ns					Day 2	0.1739	ns
Figure S6G (18mo-AD)	Sex x Time	F (4, 48) = 0.9411	0.4484	ns					Day 3	0.2289	ns
	Time	F (2.080, 24.96) = 4.561	0.0194	*					Day 4	0.9683	ns
	Sex	F (1, 12) = 0.02930	0.8669	ns					Day 5	0.4361	ns
Figure S6H (left: 12mo-VEH)	Sex x Time	F (4, 48) = 0.3689	0.8296	ns			Figure S6G (5mo-WT)	M-F	Day 1	0.9975	ns
	Time	F (1.865, 22.38) = 9.755	0.0011	**					Day 2	0.9995	ns
	Sex	F (1, 12) = 2.704	0.126	ns					Day 3	0.9973	ns
Figure S6H (left: 12mo-CCK4)	Sex x Time	F (4, 48) = 0.4905	0.7426	ns					Day 4	0.9978	ns
	Time	F (1.846, 22.15) = 54.06	<0.0001	***					Day 5	0.9913	ns
	Sex	F (1, 12) = 0.7359	0.4078	ns			Figure S6G (5mo-AD)	M-F	Day 1	0.9976	ns
Figure S6H (right: 18mo-VEH)	Sex x Time	F (4, 48) = 1.193	0.3259	ns					Day 2	0.9597	ns
	Time	F (2.107, 25.29) = 8.986	0.001	***					Day 3	0.9997	ns
	Sex	F (1, 12) = 0.06830	0.7983	ns					Day 4	>0.9999	ns
Figure S6H (right: 18mo-CCK4)	Sex x Time	F (4, 48) = 0.1073	0.9794	ns					Day 5	0.9994	ns
	Time	F (1.697, 20.37) = 22.73	<0.0001	***			Figure S6G (7mo-WT)	M-F	Day 1	0.4838	ns
	Sex	F (1, 12) = 0.2264	0.6427	ns					Day 2	0.9858	ns
									Day 3	0.9801	ns
									Day 4	>0.9999	ns
									Day 5	>0.9999	ns
							Figure S6G (7mo-AD)	M-F	Day 1	0.8262	ns
									Day 2	0.7538	ns
									Day 3	0.9998	ns
									Day 4	0.8153	ns
									Day 5	>0.9999	ns
							Figure S6G (12mo-WT)	M-F	Day 1	0.999	ns
									Day 2	0.9824	ns
									Day 3	0.8722	ns
									Day 4	0.9997	ns
									Day 5	0.6872	ns
							Figure S6G (12mo-AD)	M-F	Day 1	0.9905	ns
									Day 2	0.7243	ns
									Day 3	0.7462	ns
									Day 4	0.9855	ns
									Day 5	0.8353	ns
							Figure S6G (18mo-WT)	M-F	Day 1	0.9955	ns
									Day 2	0.9836	ns
									Day 3	0.9987	ns
									Day 4	0.9988	ns
									Day 5	0.984	ns
							Figure S6G (18mo-AD)	M-F	Day 1	0.9883	ns
									Day 2	0.9882	ns
									Day 3	0.9998	ns
									Day 4	0.9924	ns
									Day 5	0.9963	ns
							Figure S6H (left: 12mo-VEH)	M-F	Day 1	0.8813	ns
									Day 2	0.5354	ns
									Day 3	0.4536	ns
									Day 4	0.5169	ns
									Day 5	0.5392	ns
							Figure S6H (left: 12mo-CCK4)	M-F	Day 1	0.9997	ns
									Day 2	0.972	ns
									Day 3	0.7743	ns
									Day 4	0.9266	ns
									Day 5	0.7584	ns
							Figure S6H (right: 18mo-VEH)	M-F	Day 1	0.9998	ns
									Day 2	0.9325	ns
									Day 3	>0.9999	ns
									Day 4	0.9914	ns
									Day 5	0.9997	ns
							Figure S6H (right: 18mo-CCK4)	M-F	Day 1	0.993	ns
									Day 2	0.9998	ns
									Day 3	0.9993	ns
									Day 4	0.9636	ns
									Day 5	0.9968	ns

[truncated: 3 more sheets: Fig.6, Supp Fig.7, Fig.7]
