# Supplementary material for: Entorhinal cholecystokinin in Alzheimer’s disease: its earliest vulnerability and rescue effects across different disease stages
Source: Research Square preprint supplement (doi:10.21203/rs.3.rs-7630814/v1), 2025-10-29
Supplement: Supplementary file 3 [file a32c86f2493df89798bef2c9.xlsx]

## Sheet: Fig.1
Fig.1C: Cerebrum length (mm3)											Fig.1E: Cerebrum width (mm3)											Fig.1F: Cerebrum thickness (mm3)											Fig.1G: Cerebral cortical volume (mm3)											Fig.1H: Ent volume (mm3)
Age (months)	WT				3xTg-AD						Age (months)	WT				3xTg-AD						Age (months)	WT				3xTg-AD						Age (months)	WT				3xTg-AD						Age (months)	WT				3xTg-AD
2	8.35	8.8	8.7	8.55	8.15	8.7	8.55	8.65			2	7.45	7.12	7.23	7.1	7.2	7.42	6.98	7.04			2	5.75	6.25	5.9	5.98	5.63	6	5.83	6.12			2	128.66	146.08	145.32	143.2	123.83	136.52	138.46	145.98			2	7.72	6.68	7.19	7.32	6.82
5	8.55	8.75	8.95	8.83	8.9	8.55	8.4	8.75			5	7.55	7.05	7.26	7.22	7.42	7.17	7.02	7.05			5	5.83	6.25	6.03	6.12	6.23	5.98	5.78	5.85			5	135.7	150.4	141.97	143.9	125.47	135.37	130.82	142.91			5	7.75	6.74	7.22	7.35	5.85
7	8.65	9.1	8.9	8.85	8.35	8.55	8.9	8.75			7	7.14	7.53	7.31	7.4	7.27	6.8	7.1	7.15			7	5.86	6.15	6.03	6.2	6.25	5.8	5.55	5.92			7	147.6	134.83	140.1	155.4	141.79	125.96	133.07	129.72			7	7.68	6.89	7.385	7.04	6.35
12	8.8	8.6	9.14	8.9	8.8	8.6	8.2	8.25			12	7.27	7.53	7.15	7.31	6.85	7.05	6.75	7.29			12	5.8	6.02	6.25	6.1	5.95	5.43	5.75	5.87			12	150.89	134.91	142.94	143.51	130.54	114.58	123.82	128.03			12	6.67	7.58	6.98	7.12	5.83
18	8.5	8.8	8.95	8.73	8.4	8.15	7.75	8			18	7.12	7.5	7.18	7.3	6.56	6.95	6.43	6.73			18	5.93	6.23	5.85	5.85	5.25	5.64	5.48	5.56			18	130.03	145.3	137.92	135.92	104.22	124.65	100.73	116.15			18	6.38	7.21	6.64	6.82	5.12
[truncated: 55 more columns]

## Sheet: Fig.2
Fig.2A: Density of NeuN+ neurons in the global Ent (x105 cells/mm3)											Fig.2B: Mean neuronal soma in the Ent (µm2)											Fig.2D: Density of Slc17a7+ neurons in the Ent (cells/mm2)															Fig.2F: Volume of GFAP+ astrocytes in the global Ent (µm3)											Fig.2G: Density of GFAP+ astrocytes in the global Ent (cells/mm3)
Age (months)	WT				3xTg-AD						Age (months)	WT				3xTg-AD						Age (months)	WT						AD								Age (months)	WT				3xTg-AD						Age (months)	WT
2	1.39	1.63	1.58	1.39	1.37	1.55	1.54	1.44			2	90.09	93.21	86.04	95.15	91.02	92.07	89.26	95.91			2	501	532	557	492	440	620	526	567	461	523	410	500			2	249.75	240.75	205	226.75	115.25	172.25	147.75	136.75			2	3556
5	1.42	1.66	1.6	1.53	1.42	1.42	1.62	1.37			5	93.75	87.76	91.32	91.12	80.54	89.16	88.16	91.41			5	547	495	629	504	520	478	506	472	554	494	410	520			5	228	233.5	218.75	249	118.75	168.25	149.75	156.75			5	4222
7	1.44	1.61	1.6	1.64	1.45	1.25	1.42	1.23			7	96.25	93.47	93.81	89.67	82.81	79.41	84.97	88.98			7	529	549	482	621	510	440	434	390	506	434	350	480			7	247.75	228.5	208.25	216.5	123.75	172.75	141	147.25			7	5333
12	1.4	1.55	1.59	1.65	1.15	1.13	1.19	1.38			12	90.81	87.01	91.77	89.79	84.74	76.95	80.4	74.93			12	457	500	501	567	422	540	350	322	437	323	410	430			12	249	222.25	196	231.25	109.75	157	125.25	145.5			12	4000
18	1.24	1.48	1.5	1.38	0.98	0.93	1.24	1.04			18	87.07	89.93	82.74	90.04	69.92	79.21	70.82	75.73			18	524	541	476	487	440	360	318	266	320	365	310	450			18	261.75	243.75	216	242	113.25	142.75	154.5	138.5			18	4222
																						Fig.2D: Density of GAD1+ neurons in the Ent (cells/mm2)
																						Age (months)	WT						AD
																						2	239	273	221	220	200	230	239	244	203	253	180	260
																						5	200	250	258	267	260	280	220	208	230	240	264	270
																						7	221	202	244	225	250	182	188	193	156	210	240	170
																						12	192	207	213	226	260	220	152	120	169	180	150	190
																						18	207	155	202	229	250	180	127	150	196	124	95	140
[truncated: 25 more columns]

## Sheet: Supp Fig.2
Supplementary Fig.2B: Density of NeuN+ neurons in the Ent-layer I (x105 cells/mm3)											Supplementary Fig.2C: Frequency distribution (%) of neuronal soma sizes (2 Months)
Age (months)	WT				3xTg-AD						Soma area (µm2)	WT				3xTg-AD
2	0.37	0.32	0.4	0.21	0.34	0.25	0.36	0.22			20	0	0	0	0	0	0	0	0
5	0.42	0.35	0.26	0.28	0.38	0.26	0.34	0.32			40	1.05	2.33	1.83	0.72	3.97	1.86	2.17	1.02
7	0.27	0.31	0.38	0.46	0.34	0.27	0.32	0.22			60	11.11	5.42	7.25	12.19	6.8	8.31	4.34	4.71
12	0.31	0.37	0.26	0.43	0.26	0.33	0.31	0.37			80	16.35	20.94	18.42	11.04	21.42	19.39	16.88	14.89
18	0.35	0.38	0.29	0.4	0.26	0.29	0.36	0.22			100	19.23	17.67	24.84	21.82	18.31	20.53	26.83	22.38
											120	21.4	18.96	19.42	17.64	17.07	25.71	20.36	22.37
Supplementary Fig.2B: Density of NeuN+ neurons in the Ent-layer II (x105 cells/mm3)											140	15.08	19.45	16.22	18.92	16.7	14.6	15.37	17.32
Age (months)	WT				3xTg-AD						160	12.28	10.94	8.87	12.2	9.83	6.51	9.3	8.86
2	2.15	2.32	2.52	1.97	2.23	2.42	2.57	2.14			180	3.5	4.29	3.15	5.47	5.9	3.09	4.75	6.45
5	2.2	2.47	2.55	2.48	2.19	2.26	2.49	2.1
7	2.43	2.3	2.66	2.58	2.25	1.88	2.13	1.98			Supplementary Fig.2C: Frequency distribution (%) of neuronal soma sizes (5 Months)
12	2.14	2.28	2.5	2.63	1.96	1.57	1.78	1.98			Soma area (µm2)	WT				3xTg-AD
18	2.18	2.15	2.42	1.84	1.55	1.21	1.81	1.67			20	3.36	2.86	4.12	1.2	2.96	1.63	1.26	0.92
											40	11.34	14.32	5.82	9.33	12.87	9.72	11.93	8.32
Supplementary Fig.2B: Density of NeuN+ neurons in the Ent-layer III (x105 cells/mm3)											60	15.07	10.98	13.23	15.53	18.51	16.64	14.73	11.18
Age (months)	WT				3xTg-AD						80	15	23.56	20.31	19.35	17.06	22.45	21.51	25.73
2	1.4	1.88	1.51	1.63	1.37	1.78	1.42	1.63			100	19.23	18.31	26.8	24.45	25.07	17.33	22.42	20.62
5	1.42	1.84	1.66	1.52	1.33	1.62	1.68	1.43			120	15.82	12.83	10.23	9.75	11.11	12.73	13.74	10.63
7	1.4	1.79	1.62	1.67	1.48	1.37	1.54	1.17			140	10.32	8.92	13.2	12.73	6.32	12.41	7.65	13.82
12	1.48	1.77	1.54	1.68	1.12	1.04	1.28	1.39			160	4.78	2.33	2.93	5.04	2.23	3.48	5.29	3.82
18	1.25	1.67	1.41	1.53	0.87	1.18	1.08	0.99			180	5.08	5.89	3.36	2.62	3.87	3.61	1.47	4.96
Supplementary Fig.2B: Density of NeuN+ neurons in the Ent-layer V/VI (x105 cells/mm3)											Supplementary Fig.2C: Frequency distribution (%) of neuronal soma sizes (7 Months)
Age (months)	WT				3xTg-AD						Soma area (µm2)	WT				3xTg-AD
2	1.63	1.99	1.89	1.76	1.54	1.73	1.86	1.77			20	5.23	3.28	2.42	1.8	4.68	2.8	3.72	2.71
5	1.64	1.98	1.92	1.83	1.76	1.53	1.96	1.61			40	6.34	3.27	4.24	8.76	6.25	11.54	10.82	12.04
7	1.65	2.02	1.74	1.85	1.73	1.48	1.66	1.55			60	10.97	12.74	17.42	15.72	21.26	19.32	22.82	16.04
12	1.67	1.79	2.05	1.87	1.27	1.67	1.48	1.52			80	21.66	23.51	20.49	19.63	24.27	26.37	18.18	22.24
18	1.42	1.72	1.89	1.76	1.22	1.02	1.45	1.29			100	20.56	24.36	26.81	20.41	15.82	20.2	17.25	23.72
											120	17.02	19.81	18.83	15.23	15.73	11.91	17.28	13.33
											140	10.52	9.3	8.22	13.02	7.82	2.24	5.92	8.28
											160	4.4	1.23	1.34	3.03	3.27	2.92	2.63	1.22
											180	3.3	2.5	0.23	2.4	0.9	2.7	1.38	0.42
											Supplementary Fig.2c: Frequency distribution (%) of neuronal soma sizes (12 Months)
											Soma area (µm2)	WT				3xTg-AD
											20	5.69	4.63	2.82	3.27	2.31	3.82	1.72	2.28
											40	7.72	8.81	6.93	9.31	14.08	15.81	16.92	13.18
											60	15.85	19.92	13.33	16.87	18.82	24.42	22.74	20.93
											80	19.92	17.98	16.92	24.31	24.38	21.43	17.81	23.56
											100	22.35	25.71	26.84	17.92	12.04	15.27	20.37	22.24
											120	18.69	15.59	21.93	21.62	16.94	11.72	14.82	10
											140	6.52	4.92	8.92	4.29	6.92	3.42	3.67	4.79
											160	2.05	1.46	2.01	1.52	2.27	2.81	0.76	3.02
											180	1.21	0.98	0.3	0.89	2.24	1.3	1.19	0
											Supplementary Fig.2C: Frequency distribution (%) of neuronal soma sizes (18 Months)
											Soma area (µm2)	WT				3xTg-AD
											20	5.93	6.92	3.82	2.83	10.06	6.49	10.03	9.14
											40	12.04	6.83	13.97	8.76	13.54	14.93	19.04	19.81
											60	17.93	16.92	15.89	15.82	22.18	25.47	23.81	19.27
											80	16.93	19.83	20.82	24.93	21.12	20.92	17.17	14.25
											100	20.04	22.82	15.41	20.92	13.07	18.75	11.51	14.02
											120	15.47	17.93	22.04	16.05	12.38	7.42	10.1	14.42
											140	8.93	4.01	2.88	5.63	2.77	3.06	6.23	4.91
											160	1.84	2.01	3.72	4.83	2.65	1.03	0.89	1.38
											180	0.89	2.73	1.45	0.23	2.23	1.93	1.22	2.8

## Sheet: Supp Fig.3
Supplementary Fig.3B: Volume of GFAP+ astrocytes in the Ent-layer I (µm3)
Age (months)	WT				3xTg-AD
2	284	257	236	213	115	194	160	127
5	212	238	244	272	97	171	145	158
7	286	234	190	247	108	168	123	159
12	235	262	194	218	104	156	127	136
18	293	263	203	244	97	109	162	142
Supplementary Fig.3B: Volume of GFAP+ astrocytes in the Ent-layer II (µm3)
Age (months)	WT				3xTg-AD
2	256	197	199	241	128	174	154	148
5	204	227	249	252	143	174	145	179
7	256	243	213	198	122	183	157	152
12	255	228	186	237	100	164	135	142
18	268	231	187	274	115	169	141	135
Supplementary Fig.3B: Volume of GFAP+ astrocytes in the Ent-layer III (µm3)
Age (months)	WT				3xTg-AD
2	207	233	162	216	108	164	151	131
5	236	218	174	227	105	156	141	128
7	199	229	240	187	122	168	134	147
12	237	165	198	222	117	160	102	138
18	268	232	194	223	105	131	177	129
Supplementary Fig.3B: Volume of GFAP+ astrocytes in the Ent-layer V/VI (µm3)
Age (months)	WT				3xTg-AD
2	252	276	193	227	110	177	146	141
5	260	251	208	245	130	182	168	162
7	250	208	190	234	143	182	150	131
12	269	224	186	248	118	178	137	176
18	218	249	280	227	136	192	158	148

## Sheet: Fig.3
Fig.3B: Density of DCX+ cells in the DG (cells/mm2)											Fig.3D: Density of NeuN+ neurons in the global HPC (x105 cells/mm3)											Fig.3F: Volume of GFAP+ astrocytes in the global HPC (µm3)											Fig.3G: Density of GFAP+ astrocytes in the global HPC (cells/mm3)											Fig.3I: Proportion of activated microglia in the HPC (%)
Age (months)	WT				3xTg-AD						Age (months)	WT				3xTg-AD						Age (months)	WT				3xTg-AD						Age (months)	WT				3xTg-AD						Age (months)	WT				3xTg-AD
2	219	236	186	251	156	90	132	103			2	1.9	1.8	1.9	2	1.6	1.7	1.8	1.9			2	302.7	371.8	321	343.7	325.3	262.7	271.7	292.3			2	14112	13563	13236	13336	13262	12831	14271	12475			2	10.5	5.8	14.3	9.8	11.6
5	159	142	165	123	23	18	7	12			5	1.8	1.6	2	1.8	1.7	2	1.7	1.8			5	345.7	367.3	322.7	351.7	337.3	264.7	287	309.7			5	14789	12551	14033	13979	13127	13706	13067	11961			5	17.4	23.9	9.5	14.6	27.67
7	80	93	112	77	10	8	4	0			7	2	1.8	1.8	2	1.5	1.8	1.8	1.8			7	352	375.3	326.3	362	306.3	294.7	317	307.3			7	15252	13949	13032	13529	13832	14235	14305	13127			7	27.6	21.5	25.6	45.6	73.2
12	45	53	60	42	8	5	10	3			12	1.8	2	1.7	2	1.6	1.7	1.7	1.8			12	403.7	409	344.3	377	316.7	329	358	338.7			12	14933	15378	13729	12898	14937	15825	13785	14059			12	35.5	27.6	60.5	44.6	94.5
18	40	37	50	28	0	0	0	0			18	1.8	2	1.7	1.9	1.4	1.6	1.7	1.5			18	433	508.3	422.7	489.3	384.3	440.7	428.3	418.7			18	14259	13674	16607	14294	14826	15688	13919	13608			18	52.9	75.2	69.5	59.5	100
[truncated: 12 more columns]

## Sheet: Supp Fig.4
Supplementary Fig.4B: Density of NeuN+ neurons in the HPC-CA1 (x105 cells/mm3)											Supplementary Fig.4D: Density of GFAP+ astrocytes in the HPC-CA1 (cells/mm3)											Supplementary Fig.4E: Volume of GFAP+ astrocytes in the HPC-CA1 (µm3)
Age (months)	WT				3xTg-AD						Age (months)	WT				3xTg-AD						Age (months)	WT				3xTg-AD
2	2.31	1.94	1.96	2.17	1.83	1.71	1.99	2.03			2	11502	10434	13289	12817	12352	10040	12088	10342			2	342	413	318	366	336	268	304	298
5	1.93	1.71	2.12	1.87	1.92	2.21	1.8	2.03			5	14533	12828	11523	12532	10850	13087	11624	10013			5	425	312	363	372	358	282	262	308
7	2.26	2.06	1.95	2.13	1.71	1.82	2.21	1.99			7	13272	11847	12571	10937	10212	12381	13522	11946			7	338	367	378	422	315	268	336	299
12	2.25	2.31	1.92	2.28	1.69	2.12	1.99	1.92			12	11500	14652	12500	10532	13545	12210	11544	12742			12	424	442	350	388	334	366	316	401
18	2.09	2.28	2	2.33	1.65	1.93	1.81	1.72			18	13472	12150	14874	12847	13842	15096	12676	11544			18	474	535	453	522	420	502	444	468
Supplementary Fig.4B: Density of NeuN+ neurons in the HPC-CA3 (x105 cells/mm3)											Supplementary Fig.4D: Density of GFAP+ astrocytes in the HPC-CA3 (cells/mm3)											Supplementary Fig.4E: Volume of GFAP+ astrocytes in the HPC-CA3 (µm3)
Age (months)	WT				3xTg-AD						Age (months)	WT				3xTg-AD						Age (months)	WT				3xTg-AD
2	1.47	1.65	1.87	1.73	1.35	1.69	1.51	1.77			2	14628	12833	11544	13428	11542	14023	12672	10656			2	320	385	296	343	316	228	255	273
5	1.65	1.54	1.89	1.72	1.49	1.87	1.69	1.58			5	14472	11504	13482	13672	10760	13600	12072	11846			5	335	374	305	352	328	259	317	312
7	1.72	1.5	1.63	1.82	1.32	1.72	1.45	1.58			7	14047	13442	12094	14262	12262	13770	14298	11544			7	415	375	290	347	326	264	333	285
12	1.37	1.76	1.54	1.62	1.47	1.18	1.32	1.61			12	15540	13036	11865	12537	12845	15462	13826	12653			12	365	410	342	387	358	333	339	298
18	1.42	1.71	1.66	1.52	1.09	1.22	1.31	1.36			18	13764	12000	15096	12373	11100	14208	13986	12633			18	456	504	423	522	414	456	445	375
											Supplementary Fig.4D: Density of GFAP+ astrocytes in the HPC-DG (cells/mm3)											Supplementary Fig.4E: Volume of GFAP+ astrocytes in the HPC-DG (µm3)
											Age (months)	WT				3xTg-AD						Age (months)	WT				3xTg-AD
											2	16206	17423	14874	13764	15892	14430	18053	16428			2	276	317.5	349	322	344	292	256	306
											5	15362	13320	17094	15732	17772	14430	15506	14024			5	277	356	300	331	326	253	282	309
											7	18438	16558	14430	15387	19023	16553	15096	15892			7	303	384	311	317	278	352	282	338
											12	17760	18446	16823	15624	18420	19803	15984	16782			12	422	375	341	356	258	288	329	317
											18	15540	16872	19852	17662	19536	17760	15096	16648			18	422	463	488	444	339	372	396	366

## Sheet: Fig.4
Fig.4A (left): mRNA expression levels of genes in the Ent (7mo)															Fig.4B (left): mRNA expression levels of genes in the AC (7mo)															Fig.4C (left): mRNA expression levels of genes in the VC (7mo)															Fig.4D (left): mRNA expression levels of genes in the HPC (7mo)
Genes	WT						3xTg-AD								Genes	WT						3xTg-AD								Genes	WT						3xTg-AD								Genes	WT
CCK	1.00004	0.948719	0.896299	1.15753	1.1073	0.890108	0.697881	0.80723	0.872999	0.821341	0.827053	0.790618			CCK	1.0293	0.92766	0.997002	1.21982	0.810379	1.01584	0.913621	0.868422	0.809256	0.87762	0.821691	1.05312			CCK	0.911482	0.802896	0.914646	1.24771	0.987796	1.13547	0.778779	0.810726	0.887787	0.858735	0.966128	0.876779			CCK	0.810063	1.08908	0.949411	0.824794
CCK-BR	0.982322	0.914635	0.900793	1.16818	0.909577	1.12449	0.804558	0.826604	0.7512	0.903294	0.953476	0.84749			CCK-BR	0.805061	0.778717	0.885258	0.987033	1.3015	1.24244	0.711123	0.76322	0.884032	1.14327	1.12285	0.94355			CCK-BR	0.939653	0.885276	0.822564	1.18116	1.18361	0.987737	0.824847	0.789056	0.81575	0.942915	1.00222	0.974814			CCK-BR	0.881201	0.920534	0.803039	1.05668
BDNF	0.964672	0.990419	0.876066	0.924094	1.21513	1.02962	0.848573	0.823654	0.901945	0.933105	1.26761	0.753203			BDNF	1.01839	0.898938	0.972852	1.30161	0.859335	0.948877	0.855769	0.929994	0.875569	0.983702	0.859335	1.14654			BDNF	0.85607	0.883805	0.832083	1.04957	1.21067	1.16781	0.83266	0.761967	0.80374	1.07609	1.12257	0.998476			BDNF	0.976897	1.08093	0.929984	0.819763
GAD1	1.06651	0.965197	0.95125	1.04528	1.10488	0.866875	0.860291	0.875935	0.926521	1.20238	0.999235	0.853756			GAD1	1.00411	0.947971	1.04893	1.11336	0.823542	1.0621	0.868691	0.891876	0.953903	0.830421	1.10337	0.92975			GAD1	0.880005	0.883672	0.786535	1.09398	1.213	1.14281	0.861297	0.805291	0.750843	0.979137	1.14757	0.801949			GAD1	0.854668	0.945688	0.837079	0.998224
SLC1A2	0.927268	1.00212	0.865771	1.06073	0.906927	1.23718	0.802213	0.894441	0.869379	0.936959	1.09358	0.84913			SLC1A2	1.02881	0.943426	1.07325	1.24399	0.88637	0.824151	0.875987	0.976019	0.921452	0.910658	0.763119	0.874167			SLC1A2	0.997425	1.00158	0.871323	1.14495	1.16496	0.819764	0.83525	0.86052	0.974193	0.904555	1.1331	0.802337			SLC1A2	1.17956	1.12916	1.15369	0.837554
SYN1	0.890988	0.799116	0.7958	1.16835	1.21797	1.12777	0.820444	0.782671	0.815907	0.87994	0.970283	0.987928			SYN1	0.968153	0.878617	0.984393	1.19028	0.819211	1.15934	0.811862	0.843995	0.908341	0.922299	1.16903	0.889031			SYN1	0.94747	0.917737	0.815724	1.10892	0.989076	1.22108	0.884021	0.813465	0.836335	1.16809	1.06892	0.845076			SYN1	0.87118	0.904406	0.849121	1.07478
Fig.4B (middle): mRNA expression levels of genes in the Ent (12mo)															Fig.4A (middle): mRNA expression levels of genes in the AC (12mo)															Fig.4C (middle): mRNA expression levels of genes in the VC (12mo)															Fig.4D (middle): mRNA expression levels of genes in the HPC (12mo)
Genes	WT						3xTg-AD								Genes	WT						3xTg-AD								Genes	WT						3xTg-AD								Genes	WT
CCK	1.00287	1.05565	1.14166	1.02678	0.920911	0.852123	0.642217	0.623358	0.738737	0.75113	0.862223	0.78902			CCK	0.995145	1.09049	1.06953	0.838556	1.16714	0.839137	0.865124	0.771094	0.931081	0.7824	0.825293	0.681591			CCK	0.983063	1.02056	1.06169	1.10065	0.982382	0.851664	0.749165	0.809081	0.8996	0.780979	0.712695	0.863553			CCK	1.01856	1.01153	1.14912	0.798041
CCK-BR	0.893838	0.858616	0.910723	1.11968	1.12279	1.09436	0.713549	0.633354	0.662542	0.768483	0.896941	0.913885			CCK-BR	1.13575	1.04221	1.07971	0.94845	0.971067	0.822817	0.892326	0.757146	0.973089	0.840689	0.762412	0.684273			CCK-BR	0.90549	0.957782	1.00262	1.19067	0.922595	1.02085	0.836113	0.768848	0.703572	0.891168	0.91242	0.938722			CCK-BR	1.00487	0.865144	0.985557	0.807208
BDNF	0.872047	0.825579	0.899677	1.10151	1.10994	1.19125	0.693265	0.768693	0.724209	0.929469	0.897186	0.827298			BDNF	1.19937	1.08619	1.11595	0.822608	0.871322	0.904554	0.899552	1.0205	0.900175	0.849849	0.964784	0.827183			BDNF	0.936623	1.00037	1.02069	1.05595	0.841212	1.14515	0.815378	0.914808	0.849415	0.882422	0.961621	0.850004			BDNF	0.934651	1.02491	0.946385	0.847038
GAD1	0.879297	0.780474	0.904644	1.16993	1.13636	1.12929	0.747125	0.803529	0.714211	0.928145	0.907156	0.823832			GAD1	1.10275	1.03033	1.0593	0.83284	0.977462	0.997309	0.945476	0.969365	0.991794	0.795598	0.855661	0.733624			GAD1	0.976189	1.09447	1.02971	1.13385	0.970118	0.795665	0.910185	0.895169	0.811258	0.924171	0.797874	0.722081			GAD1	0.879259	0.95751	0.888448	0.981023
SLC1A2	0.921232	0.827962	0.911071	1.06263	1.18233	1.09478	0.832566	0.743104	0.778428	0.83372	0.856566	0.916773			SLC1A2	1.13225	1.00221	0.99598	0.812922	1.19019	0.86645	0.987046	1.0455	0.933802	0.778187	0.89825	0.715086			SLC1A2	1.1116	1.16202	1.08195	0.979853	0.828537	0.836036	0.852421	0.85538	0.804764	0.822813	0.849471	0.90981			SLC1A2	0.944783	1.04612	0.982177	0.844433
SYN1	1.1181	0.729032	0.803882	1.11346	1.10807	1.12744	0.833041	0.881761	0.797447	0.943739	0.760732	0.653407			SYN1	1.12579	1.0695	1.07844	0.886346	0.948646	0.891274	0.903716	0.991677	0.882667	0.816736	0.713973	0.807168			SYN1	0.930101	1.0171	1.03058	1.08107	1.09237	0.848778	0.833041	0.881761	0.797447	1.01147	0.873851	0.823854			SYN1	0.876375	0.903515	0.826806	1.00879
Fig.4B (right): mRNA expression levels of genes in the Ent (18mo)															Fig.4A (right): mRNA expression levels of genes in the AC (18mo)															Fig.4C (right): mRNA expression levels of genes in the VC (18mo)															Fig.4D (right): mRNA expression levels of genes in the HPC (18mo)
Genes	WT						3xTg-AD								Genes	WT						3xTg-AD								Genes	WT						3xTg-AD								Genes	WT
CCK	0.924103	0.881557	0.832848	1.34269	0.79011	1.22869	0.424526	0.439558	0.639992	0.656618	0.669486	0.875467			CCK	1.09082	1.14347	0.996828	0.977668	1.01074	0.780471	0.70048	0.637906	0.725183	0.946331	0.815873	0.579314			CCK	1.04083	1.15168	1.17344	0.862586	0.9571	0.814361	0.67443	0.587533	0.757722	0.821163	0.708943	0.905471			CCK	1.12214	0.991892	1.10057	1.08392
CCK-BR	0.822389	0.878974	0.889393	1.18172	0.996466	1.23105	0.458404	0.639002	0.784526	0.675905	0.558215	0.8931			CCK-BR	1.04447	1.16778	1.09715	0.846021	1.02226	0.822317	0.715372	0.787726	0.692443	0.916855	0.731924	0.788819			CCK-BR	0.994817	0.941154	0.865439	1.15389	0.825021	1.21968	0.613231	0.702467	0.596049	0.572959	0.798024	0.939851			CCK-BR	1.20391	0.85781	0.825151	1.13032
BDNF	0.8266	0.877981	0.890237	1.25811	1.13152	1.01555	0.752134	0.615257	0.664003	0.820321	0.717107	0.848074			BDNF	0.949441	1.08534	1.11122	0.826537	1.019	1.00846	0.78739	0.7744	0.876697	0.939621	0.779246	0.85806			BDNF	1.12757	0.990489	1.14331	0.853943	0.768018	1.11668	0.77766	0.850399	0.803412	0.545334	0.874913	0.865864			BDNF	0.974262	0.817552	0.944342	1.23746
GAD1	0.833335	0.942764	0.934955	1.28162	0.913812	1.09351	0.646073	0.631988	0.677818	0.723954	0.827006	0.872344			GAD1	1.10874	1.20491	1.07693	0.80884	1.00342	0.797152	0.766271	0.872318	0.843188	0.775891	0.890031	0.755722			GAD1	0.809399	0.825834	0.853773	1.17684	1.20993	1.12422	0.835044	0.676388	0.911885	0.46327	0.834465	0.792193			GAD1	1.05725	0.966816	0.951525	0.941683
SLC1A2	0.908944	0.981638	0.995341	1.18449	0.747561	1.18203	0.768471	0.657591	0.712155	0.518445	0.923551	0.915901			SLC1A2	1.06996	1.17573	1.10769	0.821058	1.00108	0.82448	0.83252	0.808633	0.930809	0.620523	0.867272	0.799714			SLC1A2	1.16394	0.962606	0.972667	0.887007	0.901886	1.11189	0.970646	0.955295	0.893796	0.787318	0.55865	0.901886			SLC1A2	0.875068	0.924962	0.821007	1.13797
SYN1	0.790506	0.871062	0.866846	1.19404	1.20068	1.07687	0.690469	0.745793	0.597432	0.795452	0.730952	0.952537			SYN1	1.03068	1.12396	1.11775	0.815406	1.02854	0.883677	0.784906	0.834851	0.891676	0.852984	0.699595	0.734885			SYN1	0.814124	0.871952	0.926794	1.23398	0.981677	1.17147	0.652623	0.693189	0.770742	0.828355	0.798476	0.881676			SYN1	0.947214	0.830333	0.862001	1.14216
[truncated: 34 more columns]

## Sheet: Supp Fig.5
Supplementary Fig.5A: mRNA expression levels of CCK in the Ent
Age (months)	WT			3xTg-AD
2	0.945	1.1	0.971	1.075	0.947	0.978
5	0.906	0.992	1.028	0.822	0.876	0.986
Supplementary Fig.5A: mRNA expression levels of CCK-BR in the Ent
Age (months)	WT			3xTg-AD
2	1.022	0.927	1.051	0.927	1.008	1.078
5	0.987	1.056	0.937	0.938	0.968	0.854

## Sheet: Fig.5
Fig.5B (left): Location preference (%)																							Fig.5D (left): Location preference (%)																							Fig.5F: Latency to fall (s)-2 Months
Age (months)	WT										3xTg-AD												Age (months)	VEH										CCK-4												Training Day	WT
2	58.4	58.2	51.1	45.3	57.5	48.7	42.1	55.6	58.4	52.3	55.7	58.3	48.1	40.4	60.6	56.4	57.9	50.2	42.5	45.4			7	58.3	50.6	58.4	48.8	52.6	43.4	55.7	58.1	52.3	59.6	56.4	55.8	52.4	58.4	43.8	48.5	42.6	50.9	53.7	56.4			1	161	271	250
5	52.5	43.7	52.6	65.8	40.6	53.7	59.1	48.3	42.5	60.2	54.9	52.3	41.7	48.1	62.8	52.8	40.6	54.1	50.3	44.7			12	48.6	45.3	58.2	60.3	54.4	44.4	53.8	56.4	49.1	52.3	47.9	48.8	58.2	53.9	54.2	40.2	50.6	49.6	57.8	52.2			2	220	300	279
7	52.7	44.1	58.7	56.4	50.4	62.4	43.9	53.7	54.1	52.9	58.3	50.6	58.4	40.8	52.5	62.4	52.8	55.3	45.7	48.9			18	45.1	62.2	58.5	45.4	45.3	56.3	58.1	60.2	51.3	48.7	58.4	52.2	50.4	43.7	54.8	53.5	58.9	45.6	52.8	51.4			3	286	300	220
12	60.6	40.6	52.3	56.4	47.9	52.2	63.4	48.9	42.7	55.1	48.6	45.3	58.2	65.3	52.4	53.4	48.6	44.4	43.8	47.3																										4	267	272	300
18	52.2	48.8	55.7	62.8	57.1	57.1	53.8	59.6	60.4	52.3	40.1	62.2	58.5	45.4	56.6	56.7	58.2	49.6	47.8	50.4			Fig.5D (right): Recognition index (%)																							5	300	300	287
																							Age (months)	VEH										CCK-4
Fig.5B (right): Recognition index (%)																							7	62.4	60.6	59.8	52.7	60.3	56.7	68.1	64.4	62.5	61.6	71.2	74.9	58.3	67.1	58.3	69.4	68.7	74.5	64.3	73.9			Fig.5F: Latency to fall (s)-5 Months
Age (months)	WT										3xTg-AD												12	56.7	45.9	56	50.3	48.3	54.7	48.3	58.9	59.4	55.5	62.7	69.1	55.8	53.8	59.2	53.9	65.6	67.8	59.6	56.4			Training Day	WT
2	64.2	77.8	75.4	71.9	83.1	75.2	83.9	68.6	75.2	80.4	75.5	59.1	69.4	80.9	71.3	76.4	86.1	67.8	84.3	82.5			18	50.8	54.8	50	47.3	46.7	51.9	54.8	42.2	56.1	53.9	51.7	58.1	60.8	53.8	59.2	58.2	63.1	61.4	57.9	56.6			1	234	272	300
5	74.8	83.4	69.6	78.6	67.6	77.4	76.1	60.9	79.6	84.3	62.6	67.1	72.9	67.8	58.4	73.4	83.3	65.6	71.9	60.5																										2	276	247	300
7	60.9	77.7	80.2	64.2	73.8	85.2	82.3	70.4	76.2	80	62.4	66.6	74.3	58.7	50.3	55.4	69.3	74.8	65.9	63.7																										3	300	253	280
12	53.8	74.8	79.7	70.5	69.5	77.3	65.4	80.5	75.4	82.2	63.7	48.9	54	53.3	45.5	62.4	83.1	60.6	42.3	67.5																										4	300	298	284
18	50.2	59.1	74.4	68.7	69.1	70.5	78.1	63.9	84.4	73.1	50.8	53.8	55.4	41.7	36.2	75.5	51.3	52.4	63.7	42.8																										5	300	300	272
																																														Fig.5F: Latency to fall (s)-7 Months
																																														Training Day	WT
																																														1	213	258	300
																																														2	300	272	300
																																														3	300	283	288
																																														4	300	300	256
																																														5	300	274	300
																																														Fig.5F: Latency to fall (s)-12 Months
																																														Training Day	WT
																																														1	233	300	274
																																														2	242	300	287
																																														3	284	276	250
																																														4	300	300	300
																																														5	300	300	300
																																														Fig.5F: Latency to fall (s)-18 Months
																																														Training Day	WT
																																														1	220	164	193
																																														2	195	223	244
																																														3	207	273	222
																																														4	242	294	251
																																														5	268	300	261
[truncated: 83 more columns]

## Sheet: Supp Fig.6
Supplementary Fig.6A (left): Location preference (%)																							Supplementary Fig.6B (left): Exploration time (s)-Training																							Supplementary Fig.6C (left): Exploration time (s)-Testing
Age (months)	WT (M)					AD (M)					WT (F)					AD (F)							Age (months)	WT										3xTg-AD												Age (months)	WT
2	58.4	58.2	51.1	45.3	57.5	55.7	58.3	48.1	40.4	60.6	48.7	42.1	55.6	58.4	52.3	56.4	57.9	50.2	42.5	45.4			2	55.5	33.2	38.2	35.9	33.8	35.7	46.4	55.5	38.9	43.3	49.6	34.7	28.4	33.5	39.5	39.8	40.7	50.2	30.9	38.6			2	25.4	14.4	20.2
5	52.5	43.7	52.6	65.8	40.6	54.9	52.3	41.7	48.1	62.8	53.7	59.1	48.3	42.5	60.2	52.8	40.6	54.1	50.3	44.7			5	41.3	50.6	39.1	32.5	35.8	58.2	50.1	34.8	42.9	40.7	30.5	40.1	29.9	38.3	22.6	27.2	44.7	50.5	33.4	37.3			5	22.6	21	18.2
7	52.7	44.1	58.7	56.4	50.4	58.3	50.6	58.4	40.8	52.5	62.4	43.9	53.7	54.1	52.9	62.4	52.8	55.3	45.7	48.9			7	39.2	38.9	42.2	48.3	30.1	53.5	32.8	39.1	40.9	42.6	32.8	32.1	19.3	38.2	22.4	32.4	29.8	38.2	20.6	27.1			7	16.1	18.3	22.4
12	60.6	40.6	52.3	56.4	47.9	48.6	45.3	58.2	65.3	52.4	52.2	63.4	48.9	42.7	55.1	53.4	48.6	44.4	43.8	47.3			12	25.1	40.3	42.9	35.7	44.6	39.2	28.6	50.1	30.4	42.3	27.2	12.3	19.7	24.6	33.5	22.6	28.9	30.2	18.4	32.8			12	23.5	17.2	17.4
18	52.2	48.8	55.7	62.8	57.1	40.1	62.2	58.5	45.4	56.6	57.1	53.8	59.6	60.4	52.3	56.7	58.2	49.6	47.8	50.4			18	28.6	39.4	20.7	34.9	37.5	38.7	41.8	50.5	22.6	39.8	30.6	15.2	25.9	17.7	12.1	22.8	26.9	20.1	14.8	34.6			18	13.4	16.8	13.1
Supplementary Fig.6A (right): Recognition index (%)																							Supplementary Fig.6B (right): Exploration time (s)-Training																							Supplementary Fig.6C (right): Exploration time (s)-Testing
Age (months)	WT (M)					AD (M)					WT (F)					AD (F)							Age (months)	WT (M)					AD (M)					WT (F)					AD (F)							Age (months)	WT (M)
2	64.2	77.8	75.4	71.9	83.1	75.5	59.1	69.4	80.9	71.3	75.2	83.9	68.6	75.2	80.4	76.4	86.1	67.8	84.3	82.5			2	55.5	33.2	38.2	35.9	33.8	49.6	34.7	28.4	33.5	39.5	35.7	46.4	55.5	38.9	43.3	39.8	40.7	50.2	30.9	38.6			2	25.4	14.4	20.2
5	74.8	83.4	69.6	78.6	67.6	62.6	67.1	72.9	67.8	58.4	77.4	76.1	60.9	79.6	84.3	73.4	83.3	65.6	71.9	60.5			5	41.3	50.6	39.1	32.5	35.8	30.5	40.1	29.9	38.3	22.6	58.2	50.1	34.8	42.9	40.7	27.2	44.7	50.5	33.4	37.3			5	22.6	21	18.2
7	60.9	77.7	80.2	64.2	73.8	62.4	66.6	74.3	58.7	50.3	85.2	82.3	70.4	76.2	80	55.4	69.3	74.8	65.9	63.7			7	39.2	38.9	42.2	48.3	30.1	32.8	32.1	19.3	38.2	22.4	53.5	32.8	39.1	40.9	42.6	32.4	29.8	38.2	20.6	27.1			7	16.1	18.3	22.4
12	53.8	74.8	79.7	70.5	69.5	63.7	48.9	54	53.3	45.5	77.3	65.4	80.5	75.4	82.2	62.4	83.1	60.6	42.3	67.5			12	25.1	40.3	42.9	35.7	44.6	27.2	12.3	19.7	24.6	33.5	39.2	28.6	50.1	30.4	42.3	22.6	28.9	30.2	18.4	32.8			12	23.5	17.2	17.4
18	50.2	59.1	74.4	68.7	69.1	50.8	53.8	55.4	41.7	36.2	70.5	78.1	63.9	84.4	73.1	75.5	51.3	52.4	63.7	42.8			18	28.6	39.4	20.7	34.9	37.5	30.6	15.2	25.9	17.7	12.1	38.7	41.8	50.5	22.6	39.8	22.8	26.9	20.1	14.8	34.6			18	13.4	16.8	13.1
[truncated: 138 more columns]

[truncated: 3 more sheets: Fig.6, Supp Fig.7, Fig.7]
